# Supplementary material for: Identification of MicroRNA Targets of Capsicum spp. Using MiRTrans—a Trans-Omics Approach
Source: Front Plant Sci. 2017 Apr 10;8:495. doi: 10.3389/fpls.2017.00495 (PMC5385386; doi:10.3389/fpls.2017.00495)
Supplement: Supplementary file 6 [file Table6.xlsx]

## Sheet: Table S2
Table S6. Pepper miRNA targets identified by trans-omics data. The transcripts are removed if their transcripts are shorter than 150bp.
microRNA family	microRNA id	Total Targets	Gene id	Function description	A. thaliana orthologs	O. sativa orthologs	Z. mays orthologs	G. max orthologs
miR156	can-miR156a-3p	1	Capana10g002436	40S ribosomal protein	AT2G37270	LOC_Os01g01060	GRMZM2G156673	Glyma09g15680
	can-miR156a-5p	11	Capana10g000709	SPL (Squamosa promoter-binding-like protein)	AT1G69170	LOC_Os02g04680	GRMZM2G061734	Glyma04g32002
			Capana02g001917	SPL (Squamosa promoter-binding-like protein)	AT2G33810	LOC_Os03g61760	GRMZM2G138421	Glyma07g31880
			Capana06g002780	F-box protein	AT3G58530	LOC_Os02g17990	GRMZM2G001180	Glyma09g15970
			Capana10g002379	SPL (Squamosa promoter-binding-like protein)	AT2G42200	LOC_Os09g31438	GRMZM2G126018	Glyma03g29901
			Capana00g002556	High affinity nitrate transporter	AT1G12940	LOC_Os01g50820	GRMZM2G455124	Glyma18g20510
			Capana05g000959	BURP domain-containing protein	AT1G49320	LOC_Os08g29200	GRMZM2G032145	Glyma11g12670
			Capana11g002003	SPL (Squamosa promoter-binding-like protein)	AT1G69170	LOC_Os09g32944	AC233751.1	Glyma04g32002
			Capana00g002746	Ankyrin repeat, PH and SEC7 domain containing protein	AT5G04690	LOC_Os09g16550	AC217293.3	Glyma09g06085
			Capana01g000970	Auxin-induced protein	AT3G45870	LOC_Os02g47500	GRMZM2G134930	Glyma16g08380
			Capana01g002647	SPL (Squamosa promoter-binding-like protein)	AT5G43270	LOC_Os02g04680	GRMZM2G097275	Glyma18g00903
			Capana03g003208	Cationic amino acid transporter 8	AT1G17120	LOC_Os01g11160	GRMZM2G404888	Glyma09g01230
	can-miR156b-3p	10	Capana03g001431	UPF0415 protein C7orf25 homolog	AT1G73380	LOC_Os10g34810	GRMZM2G032022	Glyma16g33633
			Capana11g002003	SPL (Squamosa promoter-binding-like protein)	AT1G69170	LOC_Os09g32944	AC233751.1	Glyma04g32002
			Capana01g002647	SPL (Squamosa promoter-binding-like protein)	AT5G43270	LOC_Os02g04680	GRMZM2G097275	Glyma18g00903
			Capana03g003208	Cationic amino acid transporter	AT1G17120	LOC_Os01g11160	GRMZM2G404888	Glyma09g01230
			Capana10g000709	SPL (Squamosa promoter-binding-like protein)	AT1G69170	LOC_Os02g04680	GRMZM2G061734	Glyma04g32002
			Capana02g001917	SPL (Squamosa promoter-binding-like protein)	AT2G33810	LOC_Os03g61760	GRMZM2G138421	Glyma07g31880
			Capana06g002780	F-box protein	AT3G58530	LOC_Os02g17990	GRMZM2G001180	Glyma09g15970
			Capana10g002379	SPL (Squamosa promoter-binding-like protein)	AT2G42200	LOC_Os09g31438	GRMZM2G126018	Glyma03g29901
			Capana00g002556	High affinity nitrate transporter	AT1G12940	LOC_Os01g50820	GRMZM2G455124	Glyma18g20510
			Capana05g000959	BURP domain-containing protein	AT1G49320	LOC_Os08g29200	GRMZM2G032145	Glyma11g12670
	can-miR156c-3p	9	Capana08g000991	BAG family molecular chaperone regulator	AT2G46240	LOC_Os02g48780	GRMZM2G063162	Glyma16g03320
			Capana01g002647	SPL (Squamosa promoter-binding-like protein)	AT5G43270	LOC_Os02g04680	GRMZM2G097275	Glyma18g00903
			Capana03g003208	Cationic amino acid transporter	AT1G17120	LOC_Os01g11160	GRMZM2G404888	Glyma09g01230
			Capana10g000709	SPL (Squamosa promoter-binding-like protein)	AT1G69170	LOC_Os02g04680	GRMZM2G061734	Glyma04g32002
			Capana02g001917	SPL (Squamosa promoter-binding-like protein)	AT2G33810	LOC_Os03g61760	GRMZM2G138421	Glyma07g31880
			Capana06g002780	F-box protein	AT3G58530	LOC_Os02g17990	GRMZM2G001180	Glyma09g15970
			Capana10g002379	SPL (Squamosa promoter-binding-like protein)	AT2G42200	LOC_Os09g31438	GRMZM2G126018	Glyma03g29901
			Capana00g002556	High affinity nitrate transporter	AT1G12940	LOC_Os01g50820	GRMZM2G455124	Glyma18g20510
			Capana11g002003	SPL (Squamosa promoter-binding-like protein)	AT1G69170	LOC_Os09g32944	AC233751.1	Glyma04g32002
	can-miR156d-3p	7	Capana09g001699	Mannose-1-phosphate guanylyltransferase	AT2G39770	LOC_Os03g16150	GRMZM2G149265	Glyma02g41820
			Capana03g004304	DNA topoisomerase	AT2G32000	LOC_Os09g32450	GRMZM2G102181	Glyma11g36800
			Capana04g001588	Amino acid permease	AT1G77380	LOC_Os05g34980	GRMZM2G164814	Glyma06g12270
			Capana00g004691	Early nodulin-like protein	AT1G48940	LOC_Os04g57750	GRMZM2G092338	Glyma05g07791
			Capana11g002003	SPL (Squamosa promoter-binding-like protein)	AT1G69170	LOC_Os09g32944	AC233751.1	Glyma04g32002
			Capana01g002647	SPL (Squamosa promoter-binding-like protein)	AT5G43270	LOC_Os02g04680	GRMZM2G097275	Glyma18g00903
			Capana10g000709	SPL (Squamosa promoter-binding-like protein)	AT1G69170	LOC_Os02g04680	GRMZM2G061734	Glyma04g32002
	can-miR156e-3p	11	Capana07g002391	E3 ubiquitin-protein ligase	AT1G55860	LOC_Os09g07900	GRMZM2G021299	Glyma05g26360
			Capana04g001738	Dynamin	AT1G10290	LOC_Os06g13820	GRMZM2G157462	Glyma07g40300
			Capana12g001225	Ethanolamine kinase	AT4G09760	LOC_Os05g45880	GRMZM2G014303	Glyma20g31030
			Capana07g000228	UPF0549 protein C20orf43 homolog	AT5G58020	LOC_Os06g08490	GRMZM2G067646	Glyma17g08320
			Capana11g002137	Putative pentatricopeptide repeat-containing protein	AT1G68930	LOC_Os02g01610	GRMZM2G053396	Glyma13g18250
			Capana02g001656	Ubiquitin domain-containing protein	AT1G53400	LOC_Os09g17620	GRMZM2G037150	Glyma12g36010
			Capana03g004414	Beta-amylase 1, chloroplastic	AT3G23920	LOC_Os03g04770	GRMZM2G450125	Glyma09g29840
			Capana01g002647	SPL (Squamosa promoter-binding-like protein)	AT5G43270	LOC_Os02g04680	GRMZM2G097275	Glyma18g00903
			Capana10g000709	SPL (Squamosa promoter-binding-like protein)	AT1G69170	LOC_Os02g04680	GRMZM2G061734	Glyma04g32002
			Capana04g001588	Amino acid permease	AT1G77380	LOC_Os05g34980	GRMZM2G164814	Glyma06g12270
			Capana11g002003	SPL (Squamosa promoter-binding-like protein)	AT1G69170	LOC_Os09g32944	AC233751.1	Glyma04g32002
	can-miR156f-5p	4	Capana10g000709	SPL (Squamosa promoter-binding-like protein)	AT1G69170	LOC_Os02g04680	GRMZM2G061734	Glyma04g32002
			Capana04g001588	Amino acid permease	AT1G77380	LOC_Os05g34980	GRMZM2G164814	Glyma06g12270
			Capana11g002003	SPL (Squamosa promoter-binding-like protein)	AT1G69170	LOC_Os09g32944	AC233751.1	Glyma04g32002
			Capana01g002647	SPL (Squamosa promoter-binding-like protein)	AT5G43270	LOC_Os02g04680	GRMZM2G097275	Glyma18g00903
	can-miR156g	5	Capana11g002003	SPL (Squamosa promoter-binding-like protein)	AT1G69170	LOC_Os09g32944	AC233751.1	Glyma04g32002
			Capana01g002647	SPL (Squamosa promoter-binding-like protein)	AT5G43270	LOC_Os02g04680	GRMZM2G097275	Glyma18g00903
			Capana10g000709	SPL (Squamosa promoter-binding-like protein)	AT1G69170	LOC_Os02g04680	GRMZM2G061734	Glyma04g32002
			Capana02g001917	SPL (Squamosa promoter-binding-like protein)	AT2G33810	LOC_Os03g61760	GRMZM2G138421	Glyma07g31880
			Capana10g002379	SPL (Squamosa promoter-binding-like protein)	AT2G42200	LOC_Os09g31438	GRMZM2G126018	Glyma03g29901
	can-miR156h-3p	9	Capana08g002626	Kinesin-related protein	AT2G21300	LOC_Os04g45580	GRMZM2G054418	Glyma12g04120
			Capana02g002703	Vam6/Vps39-like protein	AT4G36630	LOC_Os05g01360	GRMZM2G176735	Glyma01g38240
			Capana01g002647	SPL (Squamosa promoter-binding-like protein)	AT5G43270	LOC_Os02g04680	GRMZM2G097275	Glyma18g00903
			Capana10g000709	SPL (Squamosa promoter-binding-like protein)	AT1G69170	LOC_Os02g04680	GRMZM2G061734	Glyma04g32002
			Capana02g001917	SPL (Squamosa promoter-binding-like protein)	AT2G33810	LOC_Os03g61760	GRMZM2G138421	Glyma07g31880
			Capana10g002379	SPL (Squamosa promoter-binding-like protein)	AT2G42200	LOC_Os09g31438	GRMZM2G126018	Glyma03g29901
			Capana02g003404	THO complex subunit	AT1G24706	LOC_Os01g68810	GRMZM2G461356	Glyma05g34330
			Capana11g002003	SPL (Squamosa promoter-binding-like protein)	AT1G69170	LOC_Os09g32944	AC233751.1	Glyma04g32002
			Capana08g001178	Probable cation-transporting ATPase	AT5G23630	LOC_Os05g33390	GRMZM2G060824	Glyma04g38190
	can-miR156i	5	Capana00g001659	Tetratricopeptide repeat protein	NA	LOC_Os01g32184	GRMZM2G302405	Glyma20g25980
			Capana11g000086	Protein disulfide isomerase-like	AT5G60640	LOC_Os02g01010	GRMZM2G134889	Glyma13g40130
			Capana12g000276	Brassinosteroid-regulated protein	AT4G14130	LOC_Os06g48160	GRMZM2G413006	Glyma13g01150
			Capana02g002634	GATA transcription factor 5	AT5G66320	LOC_Os01g54210	GRMZM2G140669	Glyma01g37450
			Capana00g002502	G-type lectin S-receptor-like serine/threonine-protein kinase	AT4G03230	LOC_Os03g35600	GRMZM2G364375	Glyma12g11220
miR159	can-miR159a	3	Capana01g001817	Transcription factor GAMYB	AT3G11440	LOC_Os01g59660	GRMZM2G028054	Glyma13g04031
			Capana07g002088	Ubiquitin domain-containing protein	AT3G14860	LOC_Os02g13950	GRMZM2G026490	Glyma13g34350
			Capana06g000689	Transcription factor GAMYB	AT5G06100	LOC_Os01g59660	GRMZM2G139688	Glyma13g25716
	can-miR159b	3	Capana01g001817	Transcription factor GAMYB	AT3G11440	LOC_Os01g59660	GRMZM2G028054	Glyma13g04031
			Capana07g002088	Ubiquitin domain-containing protein	AT3G14860	LOC_Os02g13950	GRMZM2G026490	Glyma13g34350
			Capana06g000689	Transcription factor GAMYB	AT5G06100	LOC_Os01g59660	GRMZM2G139688	Glyma13g25716
	can-miR159c-3p.1	3	Capana01g001817	Transcription factor GAMYB	AT3G11440	LOC_Os01g59660	GRMZM2G028054	Glyma13g04031
			Capana07g002088	Ubiquitin domain-containing protein	AT3G14860	LOC_Os02g13950	GRMZM2G026490	Glyma13g34350
			Capana06g000689	Transcription factor GAMYB	AT5G06100	LOC_Os01g59660	GRMZM2G139688	Glyma13g25716
	can-miR159c-3p.2	2	Capana03g002099	Probable inactive receptor kinase	AT4G23740	LOC_Os01g12390	GRMZM2G127687	Glyma04g41770
			Capana10g000190	Heat shock cognate protein	AT5G56010	LOC_Os08g39140	GRMZM2G012631	Glyma02g47210
miR160	can-miR160a-5p	6	Capana06g000514	ARF (Auxin response factor)	AT2G28350	LOC_Os10g33940	GRMZM2G153233	Glyma12g29720
			Capana10g001462	ARF (Auxin response factor)	AT4G30080	LOC_Os06g47150	AC207656.3	Glyma10g06080
			Capana10g001461	ARF (Auxin response factor)	AT4G30080	LOC_Os06g47150	GRMZM2G390641	Glyma13g20382
			Capana11g000076	ARF (Auxin response factor)	AT2G28350	LOC_Os06g47150	AC207656.3	Glyma12g29720
			Capana04g001778	ARF (Auxin response factor)	AT1G77850	LOC_Os06g47150	GRMZM2G159399	Glyma04g43350
			Capana09g002164	ARF (Auxin response factor)	AT4G30080	LOC_Os06g47150	AC207656.3	Glyma10g06080
	can-miR160b-3p	8	Capana08g002837	Probable serine/threonine-protein kinase	AT2G17220	LOC_Os03g07430	GRMZM2G025127	Glyma14g00380
			Capana08g002836	Probable serine/threonine-protein kinase	AT2G17220	LOC_Os04g47620	GRMZM2G073359	Glyma02g48100
			Capana10g001462	ARF (Auxin response factor)	AT4G30080	LOC_Os06g47150	AC207656.3	Glyma10g06080
			Capana10g001461	ARF (Auxin response factor)	AT4G30080	LOC_Os06g47150	GRMZM2G390641	Glyma13g20382
			Capana11g000076	ARF (Auxin response factor)	AT2G28350	LOC_Os06g47150	AC207656.3	Glyma12g29720
			Capana04g001778	ARF (Auxin response factor)	AT1G77850	LOC_Os06g47150	GRMZM2G159399	Glyma04g43350
			Capana09g002164	ARF (Auxin response factor)	AT4G30080	LOC_Os06g47150	AC207656.3	Glyma10g06080
			Capana06g000514	ARF (Auxin response factor)	AT2G28350	LOC_Os10g33940	GRMZM2G153233	Glyma12g29720
miR162	can-miR162a-3p	5	Capana02g003042	Cyclin	AT5G67260	LOC_Os09g29100	GRMZM2G107377	Glyma05g20990
			Capana10g000733	DCL1 (Endoribonuclease Dicer homolog 1)	AT1G01040	NA	GRMZM2G040762	Glyma19g45060
			Capana10g000732	DCL1 (Endoribonuclease Dicer homolog 1)	AT1G01040	LOC_Os09g14610	GRMZM2G040762	Glyma19g45060
			Capana10g000731	DCL1 (Endoribonuclease Dicer homolog 1)	AT1G01040	NA	GRMZM2G040762	Glyma19g45060
			Capana01g002876	Probable glutamyl endopeptidase	AT2G47390	LOC_Os03g19410	GRMZM2G140432	Glyma03g37810
	can-miR162b-3p.1	3	Capana10g000733	DCL1 (Endoribonuclease Dicer homolog 1)	AT1G01040	NA	GRMZM2G040762	Glyma19g45060
			Capana10g000732	DCL1 (Endoribonuclease Dicer homolog 1)	AT1G01040	LOC_Os09g14610	GRMZM2G040762	Glyma19g45060
			Capana10g000731	DCL1 (Endoribonuclease Dicer homolog 1)	AT1G01040	NA	GRMZM2G040762	Glyma19g45060
	can-miR162b-5p	10	Capana11g000907	Nucleosome-remodeling factor subunit	AT5G12400	LOC_Os07g46690	GRMZM2G128176	Glyma11g10150
			Capana07g001041	AtF-box/kelch-repeat protein	AT1G16250	LOC_Os10g21930	GRMZM2G016878	Glyma10g03350
			Capana04g000018	Tetratricopeptide repeat protein	AT1G76630	LOC_Os01g68680	GRMZM2G398825	Glyma01g45670
			Capana04g000490	Serpin-ZX	AT1G47710	LOC_Os03g41419	GRMZM2G066996	Glyma06g03960
			Capana12g001109	DNA (cytosine-5)-methyltransferase	AT5G49160	LOC_Os07g08500	GRMZM2G334041	Glyma04g36150
			Capana10g000833	Elicitor-responsive protein	AT1G63220	LOC_Os02g42710	GRMZM2G099109	Glyma08g01490
			Capana01g000154	ABC transporter C family member	AT3G59140	LOC_Os06g06440	GRMZM2G111903	Glyma10g37160
			Capana01g002972	ATP-dependent (S)-NAD(P)H-hydrate dehydratase	AT5G19150	LOC_Os11g17610	GRMZM5G840928	Glyma07g38750
			Capana02g002552	Ubiquitin-conjugating enzyme	AT5G53300	LOC_Os02g02830	GRMZM2G132759	Glyma12g03670
			Capana10g001067	Zinc finger CCCH domain-containing protein	AT3G08505	LOC_Os06g21390	GRMZM2G395842	Glyma15g42750
	can-miR162c-3p	3	Capana10g000733	DCL1 (Endoribonuclease Dicer homolog 1)	AT1G01040	NA	GRMZM2G040762	Glyma19g45060
			Capana10g000732	DCL1 (Endoribonuclease Dicer homolog 1)	AT1G01040	LOC_Os09g14610	GRMZM2G040762	Glyma19g45060
			Capana10g000731	DCL1 (Endoribonuclease Dicer homolog 1)	AT1G01040	NA	GRMZM2G040762	Glyma19g45060
	can-miR162d	3	Capana10g000733	DCL1 (Endoribonuclease Dicer homolog 1)	AT1G01040	NA	GRMZM2G040762	Glyma19g45060
			Capana10g000732	DCL1 (Endoribonuclease Dicer homolog 1)	AT1G01040	LOC_Os09g14610	GRMZM2G040762	Glyma19g45060
			Capana10g000731	DCL1 (Endoribonuclease Dicer homolog 1)	AT1G01040	NA	GRMZM2G040762	Glyma19g45060
	can-miR162e-3p.1	3	Capana10g000733	DCL1 (Endoribonuclease Dicer homolog 1)	AT1G01040	NA	GRMZM2G040762	Glyma19g45060
			Capana10g000732	DCL1 (Endoribonuclease Dicer homolog 1)	AT1G01040	LOC_Os09g14610	GRMZM2G040762	Glyma19g45060
			Capana10g000731	DCL1 (Endoribonuclease Dicer homolog 1)	AT1G01040	NA	GRMZM2G040762	Glyma19g45060
	can-miR162e-5p	7	Capana11g000907	Nucleosome-remodeling factor subunit	AT5G12400	LOC_Os07g46690	GRMZM2G128176	Glyma11g10150
			Capana04g000018	Tetratricopeptide repeat protein	AT1G76630	LOC_Os01g68680	GRMZM2G398825	Glyma01g45670
			Capana01g003743	Formin-like protein	AT5G67470	LOC_Os10g20710	GRMZM2G075921	Glyma07g06440
			Capana12g001109	DNA (cytosine-5)-methyltransferase	AT5G49160	LOC_Os07g08500	GRMZM2G334041	Glyma04g36150
			Capana00g005107	SKP1-like protein	AT3G61415	LOC_Os03g01660	GRMZM2G109725	Glyma16g30081
			Capana10g000833	Elicitor-responsive protein	AT1G63220	LOC_Os02g42710	GRMZM2G099109	Glyma08g01490
			Capana01g002972	ATP-dependent (S)-NAD(P)H-hydrate dehydratase	AT5G19150	LOC_Os11g17610	GRMZM5G840928	Glyma07g38750
	can-miR162f-3p.1	3	Capana10g000733	DCL1 (Endoribonuclease Dicer homolog 1)	AT1G01040	NA	GRMZM2G040762	Glyma19g45060
			Capana10g000732	DCL1 (Endoribonuclease Dicer homolog 1)	AT1G01040	LOC_Os09g14610	GRMZM2G040762	Glyma19g45060
			Capana10g000731	DCL1 (Endoribonuclease Dicer homolog 1)	AT1G01040	NA	GRMZM2G040762	Glyma19g45060
	can-miR162f-5p	7	Capana10g000833	Elicitor-responsive protein	AT1G63220	LOC_Os02g42710	GRMZM2G099109	Glyma08g01490
			Capana01g002972	ATP-dependent (S)-NAD(P)H-hydrate dehydratase	AT5G19150	LOC_Os11g17610	GRMZM5G840928	Glyma07g38750
			Capana02g002552	Ubiquitin-conjugating enzyme	AT5G53300	LOC_Os02g02830	GRMZM2G132759	Glyma12g03670
			Capana10g001067	Zinc finger CCCH domain-containing protein	AT3G08505	LOC_Os06g21390	GRMZM2G395842	Glyma15g42750
			Capana11g000907	Nucleosome-remodeling factor subunit	AT5G12400	LOC_Os07g46690	GRMZM2G128176	Glyma11g10150
			Capana04g000018	Tetratricopeptide repeat protein	AT1G76630	LOC_Os01g68680	GRMZM2G398825	Glyma01g45670
			Capana12g001109	DNA (cytosine-5)-methyltransferase	AT5G49160	LOC_Os07g08500	GRMZM2G334041	Glyma04g36150
miR164	can-miR164a-3p	2	Capana08g002466	Probable receptor protein kinase	AT1G66150	LOC_Os03g50810	GRMZM2G137788	Glyma14g39290
			Capana06g000751	IAA-amino acid hydrolase ILR1-like	AT5G54140	LOC_Os04g44110	GRMZM5G831795	Glyma04g40440
	can-miR164a-5p	9	Capana01g000650	NAC (NAC domain-containing protein)	AT5G61430	LOC_Os02g36880	GRMZM5G898290	Glyma17g10970
			Capana07g002159	CUC (CUP-SHAPED COTYLEDON)	AT5G53950	LOC_Os04g38720	GRMZM2G393433	Glyma13g34950
			Capana07g002485	NAC (NAC domain-containing protein)	AT1G56010	LOC_Os12g41680	GRMZM2G063522	Glyma08g18470
			Capana03g000802	NAC (NAC domain-containing protein)	AT5G61430	LOC_Os04g38720	GRMZM2G009892	Glyma05g00930
			Capana09g001431	Chlorophyll synthase	AT3G51820	LOC_Os05g28200	GRMZM2G162672	Glyma07g18470
			Capana07g002159	NAC (NAC domain-containing protein)	AT5G53950	LOC_Os04g38720	GRMZM2G393433	Glyma13g34950
			Capana07g002485	NAC (NAC domain-containing protein)	AT1G56010	LOC_Os12g41680	GRMZM2G063522	Glyma08g18470
			Capana03g000802	NAC (NAC domain-containing protein)	AT5G61430	LOC_Os04g38720	GRMZM2G009892	Glyma05g00930
			Capana01g000650	NAC (NAC domain-containing protein)	AT5G61430	LOC_Os02g36880	GRMZM5G898290	Glyma17g10970
	can-miR164c	5	Capana01g000650	NAC (NAC domain-containing protein)	AT5G61430	LOC_Os02g36880	GRMZM5G898290	Glyma17g10970
			Capana07g002159	CUC (CUP-SHAPED COTYLEDON)	AT5G53950	LOC_Os04g38720	GRMZM2G393433	Glyma13g34950
			Capana02g003352	NAC (NAC domain-containing protein)	AT5G61430	LOC_Os04g38720	GRMZM5G898290	Glyma17g10970
			Capana07g002485	NAC (NAC domain-containing protein)	AT1G56010	LOC_Os12g41680	GRMZM2G063522	Glyma08g18470
			Capana03g000802	NAC (NAC domain-containing protein)	AT5G61430	LOC_Os04g38720	GRMZM2G009892	Glyma05g00930
	can-miR164d	5	Capana01g000650	NAC (NAC domain-containing protein)	AT5G61430	LOC_Os02g36880	GRMZM5G898290	Glyma17g10970
			Capana07g002159	CUC (CUP-SHAPED COTYLEDON)	AT5G53950	LOC_Os04g38720	GRMZM2G393433	Glyma13g34950
			Capana02g003352	NAC (NAC domain-containing protein)	AT5G61430	LOC_Os04g38720	GRMZM5G898290	Glyma17g10970
			Capana07g002485	NAC (NAC domain-containing protein)	AT1G56010	LOC_Os12g41680	GRMZM2G063522	Glyma08g18470
			Capana03g000802	NAC (NAC domain-containing protein)	AT5G61430	LOC_Os04g38720	GRMZM2G009892	Glyma05g00930
miR166	can-miR166a-3p	7	Capana11g000079	Homeobox-leucine zipper protein REVOLUTA	AT5G60690	LOC_Os10g33960	GRMZM2G109987	Glyma11g20520
			Capana12g001248	ATHB-15 (INCURVATA 4)	AT1G52150	LOC_Os03g43930	AC187157.4	Glyma08g21610
			Capana12g001247	ATHB-15 (INCURVATA 4)	AT1G52150	LOC_Os03g43930	AC187157.4	Glyma07g01940
			Capana03g000260	ATHB-15 (INCURVATA 4)	AT1G52150	LOC_Os03g43930	AC187157.4	Glyma08g21610
			Capana08g000474	ATHB-15 (INCURVATA 4)	AT1G52150	LOC_Os03g43930	GRMZM2G423337	Glyma04g09000
			Capana08g000475	ATHB-8 (HOMEOBOX GENE 8)	AT4G32880	LOC_Os03g43930	AC187157.4	Glyma06g09100
			Capana02g001374	Homeobox-leucine zipper protein HOX32	AT2G34710	LOC_Os03g43930	GRMZM2G178102	Glyma09g02750
	can-miR166a-5p	1	Capana00g003127	Gibberellin 2-beta-dioxygenase	AT1G30040	LOC_Os01g55240	GRMZM2G022679	Glyma13g33300
	can-miR166b-3p	7	Capana12g001248	ATHB-15 (INCURVATA 4)	AT1G52150	LOC_Os03g43930	AC187157.4	Glyma08g21610
			Capana12g001247	ATHB-15 (INCURVATA 4)	AT1G52150	LOC_Os03g43930	AC187157.4	Glyma07g01940
			Capana03g000260	ATHB-15 (INCURVATA 4)	AT1G52150	LOC_Os03g43930	AC187157.4	Glyma08g21610
			Capana08g000474	ATHB-15 (INCURVATA 4)	AT1G52150	LOC_Os03g43930	GRMZM2G423337	Glyma04g09000
			Capana08g000475	ATHB-8 (HOMEOBOX GENE 8)	AT4G32880	LOC_Os03g43930	AC187157.4	Glyma06g09100
			Capana02g001374	Homeobox-leucine zipper protein HOX32	AT2G34710	LOC_Os03g43930	GRMZM2G178102	Glyma09g02750
			Capana11g000079	Homeobox-leucine zipper protein REVOLUTA	AT5G60690	LOC_Os10g33960	GRMZM2G109987	Glyma11g20520
	can-miR166b-5p	1	Capana00g003127	Gibberellin 2-beta-dioxygenase	AT1G30040	LOC_Os01g55240	GRMZM2G022679	Glyma13g33300
	can-miR166c-3p	7	Capana03g000260	ATHB-15 (INCURVATA 4)	AT1G52150	LOC_Os03g43930	AC187157.4	Glyma08g21610
			Capana08g000474	ATHB-15 (INCURVATA 4)	AT1G52150	LOC_Os03g43930	GRMZM2G423337	Glyma04g09000
			Capana08g000475	ATHB-8 (HOMEOBOX GENE 8)	AT4G32880	LOC_Os03g43930	AC187157.4	Glyma06g09100
			Capana02g001374	Homeobox-leucine zipper protein HOX32	AT2G34710	LOC_Os03g43930	GRMZM2G178102	Glyma09g02750
			Capana11g000079	Homeobox-leucine zipper protein REVOLUTA	AT5G60690	LOC_Os10g33960	GRMZM2G109987	Glyma11g20520
			Capana12g001248	ATHB-15 (INCURVATA 4)	AT1G52150	LOC_Os03g43930	AC187157.4	Glyma08g21610
			Capana12g001247	ATHB-15 (INCURVATA 4)	AT1G52150	LOC_Os03g43930	AC187157.4	Glyma07g01940
	can-miR166c-5p	1	Capana00g003127	Gibberellin 2-beta-dioxygenase	AT1G30040	LOC_Os01g55240	GRMZM2G022679	Glyma13g33300
	can-miR166d-3p	7	Capana12g001248	ATHB-15 (INCURVATA 4)	AT1G52150	LOC_Os03g43930	AC187157.4	Glyma08g21610
			Capana12g001247	ATHB-15 (INCURVATA 4)	AT1G52150	LOC_Os03g43930	AC187157.4	Glyma07g01940
			Capana03g000260	ATHB-15 (INCURVATA 4)	AT1G52150	LOC_Os03g43930	AC187157.4	Glyma08g21610
			Capana08g000474	ATHB-15 (INCURVATA 4)	AT1G52150	LOC_Os03g43930	GRMZM2G423337	Glyma04g09000
			Capana08g000475	ATHB-8 (HOMEOBOX GENE 8)	AT4G32880	LOC_Os03g43930	AC187157.4	Glyma06g09100
			Capana02g001374	Homeobox-leucine zipper protein HOX32	AT2G34710	LOC_Os03g43930	GRMZM2G178102	Glyma09g02750
			Capana11g000079	Homeobox-leucine zipper protein REVOLUTA	AT5G60690	LOC_Os10g33960	GRMZM2G109987	Glyma11g20520
	can-miR166d-5p	1	Capana00g003127	Gibberellin 2-beta-dioxygenase	AT1G30040	LOC_Os01g55240	GRMZM2G022679	Glyma13g33300
	can-miR166e-3p	7	Capana03g000260	ATHB-15 (INCURVATA 4)	AT1G52150	LOC_Os03g43930	AC187157.4	Glyma08g21610
			Capana08g000474	ATHB-15 (INCURVATA 4)	AT1G52150	LOC_Os03g43930	GRMZM2G423337	Glyma04g09000
			Capana08g000475	ATHB-8 (HOMEOBOX GENE 8)	AT4G32880	LOC_Os03g43930	AC187157.4	Glyma06g09100
			Capana02g001374	Homeobox-leucine zipper protein HOX32	AT2G34710	LOC_Os03g43930	GRMZM2G178102	Glyma09g02750
			Capana11g000079	Homeobox-leucine zipper protein REVOLUTA	AT5G60690	LOC_Os10g33960	GRMZM2G109987	Glyma11g20520
			Capana12g001248	ATHB-15 (INCURVATA 4)	AT1G52150	LOC_Os03g43930	AC187157.4	Glyma08g21610
			Capana12g001247	ATHB-15 (INCURVATA 4)	AT1G52150	LOC_Os03g43930	AC187157.4	Glyma07g01940
	can-miR166f-3p	7	Capana11g000079	Homeobox-leucine zipper protein REVOLUTA	AT5G60690	LOC_Os10g33960	GRMZM2G109987	Glyma11g20520
			Capana12g001248	ATHB-15 (INCURVATA 4)	AT1G52150	LOC_Os03g43930	AC187157.4	Glyma08g21610
			Capana12g001247	ATHB-15 (INCURVATA 4)	AT1G52150	LOC_Os03g43930	AC187157.4	Glyma07g01940
			Capana03g000260	ATHB-15 (INCURVATA 4)	AT1G52150	LOC_Os03g43930	AC187157.4	Glyma08g21610
			Capana08g000474	ATHB-15 (INCURVATA 4)	AT1G52150	LOC_Os03g43930	GRMZM2G423337	Glyma04g09000
			Capana08g000475	Homeobox-leucine zipper protein ATHB	AT4G32880	LOC_Os03g43930	AC187157.4	Glyma06g09100
			Capana02g001374	Homeobox-leucine zipper protein HOX32	AT2G34710	LOC_Os03g43930	GRMZM2G178102	Glyma09g02750
	can-miR166f-5p	2	Capana00g004083	Probable serine/threonine-protein kinase	AT3G59410	LOC_Os04g41510	GRMZM2G052142	Glyma12g05640
			Capana06g000420	Fasciclin-like arabinogalactan protein	AT3G46550	LOC_Os01g62380	GRMZM2G035933	Glyma15g16650
	can-miR166g-3p	7	Capana12g001248	Homeobox-leucine zipper protein ATHB	AT1G52150	LOC_Os03g43930	AC187157.4	Glyma08g21610
			Capana12g001247	Homeobox-leucine zipper protein ATHB	AT1G52150	LOC_Os03g43930	AC187157.4	Glyma07g01940
			Capana03g000260	Homeobox-leucine zipper protein ATHB	AT1G52150	LOC_Os03g43930	AC187157.4	Glyma08g21610
			Capana08g000474	Homeobox-leucine zipper protein ATHB	AT1G52150	LOC_Os03g43930	GRMZM2G423337	Glyma04g09000
			Capana08g000475	ATHB-8 (HOMEOBOX GENE 8)	AT4G32880	LOC_Os03g43930	AC187157.4	Glyma06g09100
			Capana02g001374	Homeobox-leucine zipper protein HOX32	AT2G34710	LOC_Os03g43930	GRMZM2G178102	Glyma09g02750
			Capana11g000079	Homeobox-leucine zipper protein REVOLUTA	AT5G60690	LOC_Os10g33960	GRMZM2G109987	Glyma11g20520
	can-miR166g-5p	1	Capana00g003127	Gibberellin 2-beta-dioxygenase	AT1G30040	LOC_Os01g55240	GRMZM2G022679	Glyma13g33300
	can-miR166h-3p	7	Capana03g000260	Homeobox-leucine zipper protein ATHB	AT1G52150	LOC_Os03g43930	AC187157.4	Glyma08g21610
			Capana08g000474	Homeobox-leucine zipper protein ATHB	AT1G52150	LOC_Os03g43930	GRMZM2G423337	Glyma04g09000
			Capana08g000475	Homeobox-leucine zipper protein ATHB	AT4G32880	LOC_Os03g43930	AC187157.4	Glyma06g09100
			Capana02g001374	Homeobox-leucine zipper protein HOX32	AT2G34710	LOC_Os03g43930	GRMZM2G178102	Glyma09g02750
			Capana11g000079	Homeobox-leucine zipper protein REVOLUTA	AT5G60690	LOC_Os10g33960	GRMZM2G109987	Glyma11g20520
			Capana12g001248	Homeobox-leucine zipper protein ATHB	AT1G52150	LOC_Os03g43930	AC187157.4	Glyma08g21610
			Capana12g001247	Homeobox-leucine zipper protein ATHB	AT1G52150	LOC_Os03g43930	AC187157.4	Glyma07g01940
	can-miR166h-5p	2	Capana00g003127	Gibberellin 2-beta-dioxygenase	AT1G30040	LOC_Os01g55240	GRMZM2G022679	Glyma13g33300
			Capana03g002749	Polycomb group protein	AT5G51230	LOC_Os09g13630	GRMZM2G157422	Glyma10g23295
	can-miR166i-3p	7	Capana12g001248	Homeobox-leucine zipper protein ATHB	AT1G52150	LOC_Os03g43930	AC187157.4	Glyma08g21610
			Capana12g001247	Homeobox-leucine zipper protein ATHB	AT1G52150	LOC_Os03g43930	AC187157.4	Glyma07g01940
			Capana03g000260	Homeobox-leucine zipper protein ATHB	AT1G52150	LOC_Os03g43930	AC187157.4	Glyma08g21610
			Capana08g000474	Homeobox-leucine zipper protein ATHB	AT1G52150	LOC_Os03g43930	GRMZM2G423337	Glyma04g09000
			Capana08g000475	ATHB-8 (HOMEOBOX GENE 8)	AT4G32880	LOC_Os03g43930	AC187157.4	Glyma06g09100
			Capana02g001374	Homeobox-leucine zipper protein HOX32	AT2G34710	LOC_Os03g43930	GRMZM2G178102	Glyma09g02750
			Capana11g000079	Homeobox-leucine zipper protein REVOLUTA	AT5G60690	LOC_Os10g33960	GRMZM2G109987	Glyma11g20520
miR167	can-miR167a-5p	5	Capana03g002381	Multidrug and toxin extrusion protein	AT4G23030	LOC_Os04g48290	GRMZM2G080992	Glyma20g29470
			Capana01g002554	Multiple C2 and transmembrane domain-containing protein	AT5G48060	LOC_Os04g58720	GRMZM2G074754	Glyma09g00571
			Capana11g000507	Short-chain dehydrogenase/reductase	AT3G61220	LOC_Os07g48640	GRMZM2G003563	Glyma07g08100
			Capana04g002497	ARF (Auxin response factor)	AT1G30330	LOC_Os02g06910	GRMZM2G035405	Glyma14g38940
			Capana04g002496	ARF (Auxin response factor)	AT5G37020	LOC_Os04g57610	GRMZM2G475882	Glyma02g40650
	can-miR167b-3p	6	Capana11g001784	Putative late blight resistance protein homolog R1A-6	AT5G48620	LOC_Os02g35210	GRMZM2G461269	Glyma14g37860
			Capana06g002103	Serine/threonine-protein phosphatase	AT2G39840	LOC_Os03g16110	GRMZM2G160237	Glyma20g36510
			Capana01g002554	Multiple C2 and transmembrane domain-containing protein	AT5G48060	LOC_Os04g58720	GRMZM2G074754	Glyma09g00571
			Capana06g001814	Potassium channel SKOR	AT3G02850	LOC_Os06g14030	GRMZM2G156255	Glyma14g39330
			Capana04g002496	ARF (Auxin response factor)	AT5G37020	LOC_Os04g57610	GRMZM2G475882	Glyma02g40650
			Capana03g002381	Multidrug and toxin extrusion protein	AT4G23030	LOC_Os04g48290	GRMZM2G080992	Glyma20g29470
	can-miR167c-3p	3	Capana01g003509	COP9 signalosome complex subunit	AT1G02090	LOC_Os07g30840	GRMZM2G171745	Glyma15g35760
			Capana02g000012	Autophagy protein	AT5G17290	LOC_Os02g02570	GRMZM2G098420	Glyma02g40770
			Capana03g002381	Multidrug and toxin extrusion protein	AT4G23030	LOC_Os04g48290	GRMZM2G080992	Glyma20g29470
	can-miR167d-5p	1	Capana03g002381	Multidrug and toxin extrusion protein	AT4G23030	LOC_Os04g48290	GRMZM2G080992	Glyma20g29470
miR168	can-miR168a-5p	1	Capana12g000192	Pto-interacting protein	AT3G17410	LOC_Os05g04520	GRMZM2G061447	Glyma10g01200
	can-miR168b-3p	1	Capana08g002388	CYPRO4 protein	AT3G19240	LOC_Os02g54780	GRMZM2G363474	Glyma07g33490
miR169	can-miR169b-3p	1	Capana02g000906	Myb-related protein	AT3G47600	LOC_Os09g24800	GRMZM2G045748	Glyma09g37340
	can-miR169b-5p	1	Capana00g004836	Nuclear transcription factor Y subunit	AT3G05690	LOC_Os03g44540	GRMZM5G829103	Glyma02g35190
	can-miR169d-3p	8	Capana12g002110	Pentatricopeptide repeat-containing protein	AT3G24000	LOC_Os10g30760	GRMZM2G111780	Glyma06g48080
			Capana02g003376	Cullin	AT1G26830	LOC_Os02g51180	GRMZM2G380184	Glyma19g02540
			Capana08g002739	WD-40 repeat-containing protein	AT2G16780	LOC_Os03g43890	GRMZM2G032711	Glyma11g09700
			Capana03g002193	Uncharacterized transporter	NA	LOC_Os03g49940	GRMZM2G093849	NA
			Capana03g002042	Dipeptidyl peptidase	AT5G24260	LOC_Os02g18850	GRMZM2G174572	Glyma06g13410
			Capana04g000332	Uncharacterized sugar kinase	AT1G19600	LOC_Os01g01620	GRMZM2G051842	Glyma14g07980
			Capana10g000015	Vacuolar protein sorting-associated protein 22 homolog	AT4G27040	LOC_Os09g36020	GRMZM2G026311	Glyma08g42650
			Capana06g002552	Beta-galactosidase	AT3G13750	LOC_Os01g39830	GRMZM2G130375	Glyma17g06280
	can-miR169d-5p	1	Capana00g004836	Nuclear transcription factor Y subunit	AT3G05690	LOC_Os03g44540	GRMZM5G829103	Glyma02g35190
	can-miR169e-5p	1	Capana00g004836	Nuclear transcription factor Y subunit	AT3G05690	LOC_Os03g44540	GRMZM5G829103	Glyma02g35190
	can-miR169f-3p	2	Capana10g001121	Lon protease homolog	AT5G26860	LOC_Os07g48960	GRMZM2G113056	Glyma20g23010
			Capana03g003011	ATP-dependent zinc metalloprotease	AT1G79560	NA	NA	Glyma08g25841
	can-miR169f-5p	2	Capana10g001888	ABC transporter F family member	AT3G54540	LOC_Os03g32630	GRMZM2G018607	Glyma13g22700
			Capana00g004836	Nuclear transcription factor Y subunit	AT3G05690	LOC_Os03g44540	GRMZM5G829103	Glyma02g35190
	can-miR169g-3p	2	Capana06g002575	Elongation factor	AT5G60390	LOC_Os03g08050	AC233866.1	Glyma05g11630
			Capana12g001525	U-box domain-containing protein	AT2G24370	LOC_Os02g54590	GRMZM2G165433	Glyma17g28970
	can-miR169g-5p	1	Capana00g004836	Nuclear transcription factor Y subunit	AT3G05690	LOC_Os03g44540	GRMZM5G829103	Glyma02g35190
	can-miR169h-5p	1	Capana00g004836	Nuclear transcription factor Y subunit	AT3G05690	LOC_Os03g44540	GRMZM5G829103	Glyma02g35190
	can-miR169i-3p	1	Capana03g001721	Heat stress transcription factor	AT5G16820	LOC_Os03g63750	GRMZM2G115456	Glyma01g44330
	can-miR169i-5p	2	Capana00g004836	Nuclear transcription factor Y subunit	AT3G05690	LOC_Os03g44540	GRMZM5G829103	Glyma02g35190
			Capana00g004836	Nuclear transcription factor Y subunit	AT3G05690	LOC_Os03g44540	GRMZM5G829103	Glyma02g35190
	can-miR169j-3p	2	Capana01g001006	Formin-like protein	AT1G31810	LOC_Os10g02980	GRMZM2G414002	Glyma04g14770
			Capana02g002438	DNA mismatch repair protein	AT4G35520	LOC_Os09g37930	GRMZM2G315902	Glyma01g36280
	can-miR169k-5p	1	Capana00g004836	Nuclear transcription factor Y subunit	AT3G05690	LOC_Os03g44540	GRMZM5G829103	Glyma02g35190
miR171	can-miR171a-3p	7	Capana01g003567	SCL (Scarecrow-like protein)	AT4G00150	LOC_Os02g44370	GRMZM2G098800	Glyma03g03760
			Capana01g000561	SCL (Scarecrow-like protein)	AT4G00150	LOC_Os02g44360	GRMZM2G098800	Glyma01g18040
			Capana12g001287	Acetyl-CoA carboxylase	AT1G36160	LOC_Os10g21910	GRMZM2G377341	Glyma04g11550
			Capana02g002660	SCL (Scarecrow-like protein)	AT4G36710	LOC_Os04g46860	GRMZM2G055263	Glyma01g38360
			Capana01g000648	Periodic tryptophan protein 1 homolog	AT4G18905	LOC_Os01g69970	GRMZM2G081013	Glyma02g47740
			Capana03g001594	Monoglyceride lipase	AT1G73480	LOC_Os01g10250	GRMZM2G477743	Glyma07g12000
			Capana04g000153	Expansin	AT1G20190	LOC_Os04g15840	GRMZM2G074585	Glyma04g02380
	can-miR171b-3p	3	Capana01g000561	SCL (Scarecrow-like protein)	AT4G00150	LOC_Os02g44360	GRMZM2G098800	Glyma01g18040
			Capana02g002660	SCL (Scarecrow-like protein)	AT4G36710	LOC_Os04g46860	GRMZM2G055263	Glyma01g38360
			Capana01g003567	SCL (Scarecrow-like protein)	AT4G00150	LOC_Os02g44370	GRMZM2G098800	Glyma03g03760
	can-miR171c-3p	3	Capana01g003567	SCL (Scarecrow-like protein)	AT4G00150	LOC_Os02g44370	GRMZM2G098800	Glyma03g03760
			Capana01g000561	SCL (Scarecrow-like protein)	AT4G00150	LOC_Os02g44360	GRMZM2G098800	Glyma01g18040
			Capana02g002660	SCL (Scarecrow-like protein)	AT4G36710	LOC_Os04g46860	GRMZM2G055263	Glyma01g38360
	can-miR171c-5p	2	Capana07g000948	Probable phospholipase A2 homolog	AT4G29460	LOC_Os02g58500	GRMZM2G045294	Glyma01g00710
			Capana11g001809	Pentatricopeptide repeat-containing protein	AT4G32450	LOC_Os01g53610	GRMZM2G158645	Glyma08g11931
	can-miR171d	3	Capana01g000561	SCL (Scarecrow-like protein)	AT4G00150	LOC_Os02g44360	GRMZM2G098800	Glyma01g18040
			Capana02g002660	SCL (Scarecrow-like protein)	AT4G36710	LOC_Os04g46860	GRMZM2G055263	Glyma01g38360
			Capana01g003567	SCL (Scarecrow-like protein)	AT4G00150	LOC_Os02g44370	GRMZM2G098800	Glyma03g03760
	can-miR171e-3p	3	Capana01g000561	SCL (Scarecrow-like protein)	AT4G00150	LOC_Os02g44360	GRMZM2G098800	Glyma01g18040
			Capana02g002660	SCL (Scarecrow-like protein)	AT4G36710	LOC_Os04g46860	GRMZM2G055263	Glyma01g38360
			Capana01g003567	SCL (Scarecrow-like protein)	AT4G00150	LOC_Os02g44370	GRMZM2G098800	Glyma03g03760
	can-miR171e-5p	2	Capana02g000816	SPX domain-containing protein	AT5G15330	LOC_Os03g61200	GRMZM2G122108	Glyma13g05570
			Capana01g004455	BTB/POZ domain-containing protein	AT5G41330	LOC_Os07g23720	GRMZM2G157379	Glyma08g01900
	can-miR171f-3p	3	Capana01g003567	SCL (Scarecrow-like protein)	AT4G00150	LOC_Os02g44370	GRMZM2G098800	Glyma03g03760
			Capana01g000561	SCL (Scarecrow-like protein)	AT4G00150	LOC_Os02g44360	GRMZM2G098800	Glyma01g18040
			Capana02g002660	SCL (Scarecrow-like protein)	AT4G36710	LOC_Os04g46860	GRMZM2G055263	Glyma01g38360
	can-miR171g-3p	3	Capana01g000561	SCL (Scarecrow-like protein)	AT4G00150	LOC_Os02g44360	GRMZM2G098800	Glyma01g18040
			Capana02g002660	SCL (Scarecrow-like protein)	AT4G36710	LOC_Os04g46860	GRMZM2G055263	Glyma01g38360
			Capana01g003567	SCL (Scarecrow-like protein)	AT4G00150	LOC_Os02g44370	GRMZM2G098800	Glyma03g03760
	can-miR171h-3p	3	Capana04g002119	Nodulation-signaling pathway 2 protein	AT4G08250	LOC_Os03g15680	GRMZM2G055263	Glyma06g11610
			Capana01g003567	SCL (Scarecrow-like protein)	AT4G00150	LOC_Os02g44370	GRMZM2G098800	Glyma03g03760
			Capana07g001312	Putative proline-rich receptor-like protein kinase	AT3G21630	LOC_Os08g42580	GRMZM2G317770	Glyma20g11530
	can-miR171h-5p	3	Capana01g001469	Sulfotransferase	AT1G74090	LOC_Os11g30810	GRMZM2G341959	Glyma08g36400
			Capana02g001062	DEAD-box ATP-dependent RNA helicase	AT2G33730	NA	GRMZM2G057394	Glyma07g39910
			Capana05g001959	Putative UDP-glucose flavonoid 3-O-glucosyltransferase	AT3G21760	LOC_Os07g32010	GRMZM2G113794	Glyma02g47990
	can-miR171i-3p	2	Capana04g002119	NSP2 (Nodulation-signaling pathway 2 protein)	AT4G08250	LOC_Os03g15680	GRMZM2G055263	Glyma06g11610
			Capana01g003567	SCL (Scarecrow-like protein)	AT4G00150	LOC_Os02g44370	GRMZM2G098800	Glyma03g03760
	can-miR171j-3p	2	Capana04g002119	NSP2 (Nodulation-signaling pathway 2 protein)	AT4G08250	LOC_Os03g15680	GRMZM2G055263	Glyma06g11610
			Capana01g003567	SCL (Scarecrow-like protein)	AT4G00150	LOC_Os02g44370	GRMZM2G098800	Glyma03g03760
miR172	can-miR172a-3p	7	Capana11g000645	ERF (Ethylene-responsive transcription factor)	AT2G28550	LOC_Os05g03040	GRMZM2G700665	Glyma12g07800
			Capana06g000481	ERF (Ethylene-responsive transcription factor)	AT2G28550	LOC_Os03g60430	GRMZM2G700665	Glyma13g40470
			Capana02g000700	AP2 domain-containing transcription factor	AT4G36920	LOC_Os07g13170	GRMZM2G700665	Glyma17g18640
			Capana02g003062	AP2 domain-containing transcription factor	AT4G36920	LOC_Os04g55560	GRMZM2G416701	Glyma01g39520
			Capana11g001088	Vignain	AT5G50260	LOC_Os08g44270	GRMZM2G456217	Glyma06g18390
			Capana09g001880	AP2 domain-containing transcription factor	AT2G28550	LOC_Os07g13170	GRMZM5G862109	Glyma13g40470
			Capana04g002188	AP2 domain-containing transcription factor	AT4G36920	LOC_Os04g55560	GRMZM2G700665	Glyma17g18640
	can-miR172b-3p	6	Capana02g000700	AP2 domain-containing transcription factor	AT4G36920	LOC_Os07g13170	GRMZM2G700665	Glyma17g18640
			Capana02g003062	AP2 domain-containing transcription factor	AT4G36920	LOC_Os04g55560	GRMZM2G416701	Glyma01g39520
			Capana09g001880	AP2 domain-containing transcription factor	AT2G28550	LOC_Os07g13170	GRMZM5G862109	Glyma13g40470
			Capana04g002188	AP2 domain-containing transcription factor	AT4G36920	LOC_Os04g55560	GRMZM2G700665	Glyma17g18640
			Capana11g000645	ERF (Ethylene-responsive transcription factor)	AT2G28550	LOC_Os05g03040	GRMZM2G700665	Glyma12g07800
			Capana06g000481	ERF (Ethylene-responsive transcription factor)	AT2G28550	LOC_Os03g60430	GRMZM2G700665	Glyma13g40470
	can-miR172c-3p	6	Capana09g001880	AP2 domain-containing transcription factor	AT2G28550	LOC_Os07g13170	GRMZM5G862109	Glyma13g40470
			Capana04g002188	AP2 domain-containing transcription factor	AT4G36920	LOC_Os04g55560	GRMZM2G700665	Glyma17g18640
			Capana11g000645	ERF (Ethylene-responsive transcription factor)	AT2G28550	LOC_Os05g03040	GRMZM2G700665	Glyma12g07800
			Capana06g000481	ERF (Ethylene-responsive transcription factor)	AT2G28550	LOC_Os03g60430	GRMZM2G700665	Glyma13g40470
			Capana02g000700	AP2 domain-containing transcription factor	AT4G36920	LOC_Os07g13170	GRMZM2G700665	Glyma17g18640
			Capana02g003062	AP2 domain-containing transcription factor	AT4G36920	LOC_Os04g55560	GRMZM2G416701	Glyma01g39520
	can-miR172c-5p	1	Capana04g002508	Probable acyl-activating enzyme	AT1G21540	LOC_Os04g57850	GRMZM2G105330	Glyma14g38920
	can-miR172d-3p	6	Capana02g000700	AP2 domain-containing transcription factor	AT4G36920	LOC_Os07g13170	GRMZM2G700665	Glyma17g18640
			Capana02g003062	AP2 domain-containing transcription factor	AT4G36920	LOC_Os04g55560	GRMZM2G416701	Glyma01g39520
			Capana09g001880	AP2 domain-containing transcription factor	AT2G28550	LOC_Os07g13170	GRMZM5G862109	Glyma13g40470
			Capana04g002188	AP2 domain-containing transcription factor	AT4G36920	LOC_Os04g55560	GRMZM2G700665	Glyma17g18640
			Capana11g000645	ERF (Ethylene-responsive transcription factor)	AT2G28550	LOC_Os05g03040	GRMZM2G700665	Glyma12g07800
			Capana06g000481	ERF (Ethylene-responsive transcription factor)	AT2G28550	LOC_Os03g60430	GRMZM2G700665	Glyma13g40470
	can-miR172e-3p	8	Capana04g002585	Receptor-like serine/threonine-protein kinase	AT4G21380	LOC_Os07g36544	GRMZM2G106702	Glyma08g06520
			Capana02g000700	AP2 domain-containing transcription factor	AT4G36920	LOC_Os07g13170	GRMZM2G700665	Glyma17g18640
			Capana02g003062	AP2 domain-containing transcription factor	AT4G36920	LOC_Os04g55560	GRMZM2G416701	Glyma01g39520
			Capana09g001880	AP2 domain-containing transcription factor	AT2G28550	LOC_Os07g13170	GRMZM5G862109	Glyma13g40470
			Capana03g000371	Serine/threonine-protein phosphatase 2A 65 kDa regulatory subunit	AT3G25800	LOC_Os09g07510	GRMZM2G102858	Glyma20g24790
			Capana04g002188	AP2 domain-containing transcription factor	AT4G36920	LOC_Os04g55560	GRMZM2G700665	Glyma17g18640
			Capana11g000645	ERF (Ethylene-responsive transcription factor)	AT2G28550	LOC_Os05g03040	GRMZM2G700665	Glyma12g07800
			Capana06g000481	ERF (Ethylene-responsive transcription factor)	AT2G28550	LOC_Os03g60430	GRMZM2G700665	Glyma13g40470
	can-miR172f-3p	7	Capana04g002188	AP2 domain-containing transcription factor	AT4G36920	LOC_Os04g55560	GRMZM2G700665	Glyma17g18640
			Capana11g000645	ERF (Ethylene-responsive transcription factor)	AT2G28550	LOC_Os05g03040	GRMZM2G700665	Glyma12g07800
			Capana06g000481	ERF (Ethylene-responsive transcription factor)	AT2G28550	LOC_Os03g60430	GRMZM2G700665	Glyma13g40470
			Capana04g002585	Receptor-like serine/threonine-protein kinase	AT4G21380	LOC_Os07g36544	GRMZM2G106702	Glyma08g06520
			Capana02g000700	AP2 domain-containing transcription factor	AT4G36920	LOC_Os07g13170	GRMZM2G700665	Glyma17g18640
			Capana02g003062	AP2 domain-containing transcription factor	AT4G36920	LOC_Os04g55560	GRMZM2G416701	Glyma01g39520
			Capana09g001880	AP2 domain-containing transcription factor	AT2G28550	LOC_Os07g13170	GRMZM5G862109	Glyma13g40470
	can-miR172f-5p	6	Capana11g001349	F-box/kelch-repeat protein	AT3G06240	LOC_Os06g19670	GRMZM2G442489	Glyma13g28210
			Capana01g000665	Methyltransferase-like protein	AT2G26200	LOC_Os03g04940	GRMZM5G860938	Glyma14g11130
			Capana03g000115	Exocyst complex component	AT1G72470	LOC_Os09g26820	GRMZM2G029527	Glyma07g04600
			Capana06g001002	Hypersensitive-induced response protein	AT5G62740	LOC_Os05g51420	GRMZM2G070659	Glyma17g10520
			Capana11g001115	Probable LRR receptor-like serine/threonine-protein kinase	AT1G67720	LOC_Os11g01200	GRMZM2G091632	Glyma18g01450
			Capana08g002060	LMBR1 domain-containing protein 2 homolog	AT5G65290	LOC_Os02g52160	GRMZM2G308193	Glyma18g01850
	can-miR172g-3p	3	Capana04g002188	AP2 domain-containing transcription factor	AT4G36920	LOC_Os04g55560	GRMZM2G700665	Glyma17g18640
			Capana11g000645	ERF (Ethylene-responsive transcription factor)	AT2G28550	LOC_Os05g03040	GRMZM2G700665	Glyma12g07800
			Capana06g000481	ERF (Ethylene-responsive transcription factor)	AT2G28550	LOC_Os03g60430	GRMZM2G700665	Glyma13g40470
	can-miR172h-3p	7	Capana04g002188	AP2 domain-containing transcription factor	AT4G36920	LOC_Os04g55560	GRMZM2G700665	Glyma17g18640
			Capana11g000645	ERF (Ethylene-responsive transcription factor)	AT2G28550	LOC_Os05g03040	GRMZM2G700665	Glyma12g07800
			Capana06g000481	ERF (Ethylene-responsive transcription factor)	AT2G28550	LOC_Os03g60430	GRMZM2G700665	Glyma13g40470
			Capana04g002585	Receptor-like serine/threonine-protein kinase	AT4G21380	LOC_Os07g36544	GRMZM2G106702	Glyma08g06520
			Capana02g000700	AP2 domain-containing transcription factor	AT4G36920	LOC_Os07g13170	GRMZM2G700665	Glyma17g18640
			Capana02g003062	AP2 domain-containing transcription factor	AT4G36920	LOC_Os04g55560	GRMZM2G416701	Glyma01g39520
			Capana09g001880	AP2 domain-containing transcription factor	AT2G28550	LOC_Os07g13170	GRMZM5G862109	Glyma13g40470
	can-miR172i-3p	6	Capana02g000700	AP2 domain-containing transcription factor	AT4G36920	LOC_Os07g13170	GRMZM2G700665	Glyma17g18640
			Capana02g003062	AP2 domain-containing transcription factor	AT4G36920	LOC_Os04g55560	GRMZM2G416701	Glyma01g39520
			Capana09g001880	AP2 domain-containing transcription factor	AT2G28550	LOC_Os07g13170	GRMZM5G862109	Glyma13g40470
			Capana04g002188	AP2 domain-containing transcription factor	AT4G36920	LOC_Os04g55560	GRMZM2G700665	Glyma17g18640
			Capana11g000645	ERF (Ethylene-responsive transcription factor)	AT2G28550	LOC_Os05g03040	GRMZM2G700665	Glyma12g07800
			Capana06g000481	ERF (Ethylene-responsive transcription factor)	AT2G28550	LOC_Os03g60430	GRMZM2G700665	Glyma13g40470
miR319	can-miR319a	4	Capana00g005070	TCP family transcription factor	AT4G18390	LOC_Os07g05720	GRMZM2G020805	Glyma13g29160
			Capana07g001792	TCP family transcription factor	AT3G15030	LOC_Os01g11550	AC205574.3	Glyma13g36840
			Capana09g000876	TCP family transcription factor	AT3G15030	LOC_Os01g11550	AC205574.3	Glyma06g34330
			Capana07g002142	TCP family transcription factor	AT3G15030	LOC_Os01g11550	AC205574.3	Glyma12g20160
	can-miR319b-3p.1	4	Capana00g005070	TCP family transcription factor	AT4G18390	LOC_Os07g05720	GRMZM2G020805	Glyma13g29160
			Capana07g001792	TCP family transcription factor	AT3G15030	LOC_Os01g11550	AC205574.3	Glyma13g36840
			Capana09g000876	TCP family transcription factor	AT3G15030	LOC_Os01g11550	AC205574.3	Glyma06g34330
			Capana07g002142	TCP family transcription factor	AT3G15030	LOC_Os01g11550	AC205574.3	Glyma12g20160
	can-miR319b-5p	2	Capana06g000016	Cullin	AT4G02570	LOC_Os01g27150	GRMZM2G166089	Glyma17g02800
			Capana01g000740	Protein Dom3z homolog	AT4G17620	LOC_Os05g32580	GRMZM2G427337	Glyma01g41250
miR393	can-miR393a-3p	1	Capana02g003450	Alpha-mannosidase	AT5G14950	LOC_Os06g13650	GRMZM2G075470	Glyma19g01890
	can-miR393a-5p	3	Capana06g000011	TIR (TRANSPORT INHIBITOR RESPONSE)	AT3G62980	LOC_Os05g05800	GRMZM2G135978	Glyma03g36770
			Capana02g003700	AFB (AUXIN SIGNALING F-BOX)	AT3G26810	LOC_Os04g32460	GRMZM2G137451	Glyma02g07240
			Capana06g003032	TIR (TRANSPORT INHIBITOR RESPONSE)	AT3G62980	LOC_Os05g05800	GRMZM2G135978	Glyma10g02630
miR394	can-miR394a	1	Capana11g001015	F-box family protein	AT1G27340	LOC_Os01g69940	GRMZM2G119650	Glyma18g00870
	can-miR394b	1	Capana11g001015	F-box family protein	AT1G27340	LOC_Os01g69940	GRMZM2G119650	Glyma18g00870
miR395	can-miR395h	1	Capana10g002068	Digalactosyldiacylglycerol synthase	AT3G11670	LOC_Os04g34000	GRMZM2G092588	Glyma19g38720
miR396	can-miR396a-3p	1	Capana08g002256	Probable phosphoribosylformylglycinamidine synthase	AT1G74260	LOC_Os01g66500	GRMZM2G000622	Glyma18g04070
	can-miR396a-5p	7	Capana09g001206	Heat shock protein	AT1G07200	LOC_Os12g01360	GRMZM2G109674	Glyma18g06990
			Capana12g001816	Vetispiradiene synthase	AT5G23960	LOC_Os08g04500	GRMZM2G179092	Glyma12g17390
			Capana10g002486	DNA (cytosine-5)-methyltransferase	AT5G14620	LOC_Os03g02010	GRMZM2G092497	Glyma05g08740
			Capana12g002014	B3 domain-containing protein	AT2G27410	NA	NA	Glyma01g28196
			Capana04g000859	MADS-box protein	AT2G22540	LOC_Os02g52340	GRMZM2G046885	Glyma02g04710
			Capana07g000549	DNA (cytosine-5)-methyltransferase	AT5G14620	LOC_Os03g02010	GRMZM2G137366	Glyma05g08740
			Capana02g000460	DNA (cytosine-5)-methyltransferase	AT5G14620	LOC_Os12g01800	GRMZM2G092497	Glyma05g08740
	can-miR396b-5p	7	Capana04g000859	MADS-box protein	AT2G22540	LOC_Os02g52340	GRMZM2G046885	Glyma02g04710
			Capana07g000549	DNA (cytosine-5)-methyltransferase	AT5G14620	LOC_Os03g02010	GRMZM2G137366	Glyma05g08740
			Capana02g000460	DNA (cytosine-5)-methyltransferase	AT5G14620	LOC_Os12g01800	GRMZM2G092497	Glyma05g08740
			Capana09g001207	Chaperone protein	AT2G29970	LOC_Os12g01360	GRMZM2G109674	Glyma14g37300
			Capana09g001206	Heat shock protein	AT1G07200	LOC_Os12g01360	GRMZM2G109674	Glyma18g06990
			Capana12g001816	Vetispiradiene synthase	AT5G23960	LOC_Os08g04500	GRMZM2G179092	Glyma12g17390
			Capana10g002486	DNA (cytosine-5)-methyltransferase	AT5G14620	LOC_Os03g02010	GRMZM2G092497	Glyma05g08740
			Capana12g002014	B3 domain-containing protein	AT2G27410	NA	NA	Glyma01g28196
	can-miR396c-5p	4	Capana02g000460	DNA (cytosine-5)-methyltransferase	AT5G14620	LOC_Os12g01800	GRMZM2G092497	Glyma05g08740
			Capana10g002486	DNA (cytosine-5)-methyltransferase	AT5G14620	LOC_Os03g02010	GRMZM2G092497	Glyma05g08740
			Capana12g002014	B3 domain-containing protein	AT2G27410	NA	NA	Glyma01g28196
			Capana07g000549	DNA (cytosine-5)-methyltransferase	AT5G14620	LOC_Os03g02010	GRMZM2G137366	Glyma05g08740
	can-miR396d-5p	5	Capana10g002486	DNA (cytosine-5)-methyltransferase	AT5G14620	LOC_Os03g02010	GRMZM2G092497	Glyma05g08740
			Capana12g002014	B3 domain-containing protein	AT2G27410	NA	NA	Glyma01g28196
			Capana07g000549	DNA (cytosine-5)-methyltransferase	AT5G14620	LOC_Os03g02010	GRMZM2G137366	Glyma05g08740
			Capana02g000460	DNA (cytosine-5)-methyltransferase	AT5G14620	LOC_Os12g01800	GRMZM2G092497	Glyma05g08740
			Capana12g001816	Vetispiradiene synthase	AT5G23960	LOC_Os08g04500	GRMZM2G179092	Glyma12g17390
miR397	can-miR397a-5p	3	Capana06g000406	Laccase	AT2G29130	LOC_Os01g62490	GRMZM2G072808	Glyma12g06480
			Capana09g001569	Laccase	AT2G38080	LOC_Os11g48060	GRMZM2G072808	Glyma18g07240
			Capana10g001373	Laccase	AT2G38080	LOC_Os11g48060	GRMZM2G072808	Glyma02g38990
	can-miR397b	3	Capana06g000406	Laccase	AT2G29130	LOC_Os01g62490	GRMZM2G072808	Glyma12g06480
			Capana05g001689	Pentatricopeptide repeat-containing protein	AT3G42630	LOC_Os08g40870	GRMZM2G129288	Glyma03g04350
			Capana10g001373	Laccase	AT2G38080	LOC_Os11g48060	GRMZM2G072808	Glyma02g38990
miR398	can-miR398a-3p	2	Capana06g000971	Pollen-specific protein	AT1G10200	LOC_Os12g32620	GRMZM2G004959	Glyma06g19680
			Capana04g001510	Pentatricopeptide repeat-containing protein	AT1G43980	LOC_Os03g32090	GRMZM2G028648	Glyma12g05960
	can-miR398a-5p	2	Capana02g002115	Receptor-like serine/threonine-protein kinase	AT4G21380	LOC_Os01g57560	GRMZM2G465999	Glyma13g32250
			Capana01g003639	Serine/threonine-protein kinase	AT3G51270	LOC_Os01g66520	GRMZM2G472991	Glyma11g33320
	can-miR398b-3p	1	Capana06g000971	Pollen-specific protein	AT1G10200	LOC_Os12g32620	GRMZM2G004959	Glyma06g19680
	can-miR398b-5p	2	Capana08g002299	Probable serine/threonine-protein kinase	AT2G17220	LOC_Os02g02600	GRMZM2G025127	Glyma02g48100
			Capana06g001905	Disease resistance response protein	AT1G55210	LOC_Os11g07830	GRMZM2G159503	Glyma19g33290
	can-miR398c-3p	3	Capana02g001283	Uncharacterized protein	AT4G19900	LOC_Os07g37990	GRMZM5G897546	Glyma20g02454
			Capana03g001225	Pentatricopeptide repeat-containing protein	AT3G48250	LOC_Os01g73950	GRMZM5G838388	Glyma17g09180
			Capana06g000971	Pollen-specific protein	AT1G10200	LOC_Os12g32620	GRMZM2G004959	Glyma06g19680
	can-miR398d-3p	3	Capana06g000971	Pollen-specific protein	AT1G10200	LOC_Os12g32620	GRMZM2G004959	Glyma06g19680
			Capana11g000197	Aspartic proteinase-like protein	AT5G22850	LOC_Os01g56930	GRMZM2G133029	Glyma12g30430
			Capana03g002557	Putative glycerol-3-phosphate transporter	AT3G47420	LOC_Os04g46880	GRMZM5G843302	Glyma12g01590
	can-miR398e-3p	1	Capana11g000173	Copper/Zinc Superoxide Dismutase	AT2G28190	LOC_Os08g44770	GRMZM2G106928	Glyma11g19840
miR399	can-miR399a-5p	1	Capana00g004053	Fasciclin-like arabinogalactan protein	AT2G04780	LOC_Os09g30486	AC234156.1	Glyma14g00830
	can-miR399d-5p	1	Capana03g002156	Heat shock protein	AT5G52640	LOC_Os04g01740	GRMZM5G833699	Glyma09g24410
	can-miR399f-5p	2	Capana10g001554	Non-specific lipid-transfer protein	AT2G38540	LOC_Os11g02369	GRMZM2G101958	Glyma01g32750
			Capana03g000131	Telomere repeat-binding protein	AT1G72650	LOC_Os02g53670	GRMZM2G049194	Glyma16g00870
miR403a	can-miR403-5p	1	Capana00g004063	Probable 3-hydroxyisobutyrate dehydrogenase	AT4G20930	LOC_Os06g46372	GRMZM2G014813	Glyma09g02900
miR408a	can-miR408-3p	4	Capana10g001080	PsbP-like protein	AT2G39470	LOC_Os03g17174	GRMZM2G471904	Glyma20g23100
			Capana00g000115	Uncharacterized protein	AT1G61080	NA	GRMZM2G108284	Glyma13g25200
			Capana03g004004	Alba-like protein C9orf23 homolog	AT3G07030	LOC_Os03g06980	GRMZM2G065669	Glyma18g38103
			Capana06g002269	Laccase	AT2G40370	LOC_Os01g61160	GRMZM2G132169	Glyma14g06070
miR477a	can-miR477a-5p	1	Capana02g002475	Probable acyl-activating enzyme	AT2G17650	LOC_Os03g04120	GRMZM2G465806	Glyma11g08890
	can-miR477b-5p	3	Capana07g000366	Probable sucrose-phosphate synthase	AT5G20280	LOC_Os08g20660	GRMZM2G055331	Glyma13g23060
			Capana02g002475	Probable acyl-activating enzyme	AT2G17650	LOC_Os03g04120	GRMZM2G465806	Glyma11g08890
			Capana03g002709	Branchpoint-bridging protein	AT5G51300	LOC_Os10g31900	GRMZM2G034313	Glyma12g00850
miR482a	can-miR482a-3p	2	Capana11g002380	Probable phenylalanine--tRNA ligase alpha subunit	AT4G39280	LOC_Os10g26130	GRMZM2G101463	Glyma12g04730
			Capana08g002533	Probable phenylalanine--tRNA ligase alpha subunit	AT4G39280	LOC_Os10g26130	GRMZM2G101463	Glyma12g04730
	can-miR482b-3p	8	Capana05g000686	Disease resistance protein	AT3G46530	LOC_Os10g04674	GRMZM2G091672	Glyma11g07680
			Capana05g000687	Probable disease resistance protein	AT1G58807	LOC_Os04g46300	AC203972.3	Glyma18g50460
			Capana03g001868	Disease resistance protein	AT3G46730	LOC_Os07g08890	GRMZM2G162098	Glyma01g37620
			Capana05g000597	Disease resistance protein	AT3G46530	LOC_Os10g04180	GRMZM2G078013	Glyma11g07680
			Capana05g000713	Disease resistance protein	AT3G46730	LOC_Os12g31620	GRMZM2G091696	Glyma01g37620
			Capana03g001889	Disease resistance protein	AT3G46530	LOC_Os03g20840	GRMZM2G091672	Glyma15g37320
			Capana03g001876	Disease resistance protein	AT1G58602	LOC_Os12g31620	AC203972.3	Glyma01g37620
			Capana05g000769	Disease resistance protein	AT3G46730	LOC_Os10g04674	GRMZM2G162098	Glyma11g07680
	can-miR482d-5p	2	Capana03g003698	Histone-lysine N-methyltransferase	AT1G73100	LOC_Os01g59620	GRMZM2G117458	Glyma03g27441
			Capana02g000312	E3 ubiquitin ligase BIG BROTHER-related	AT3G19910	LOC_Os08g43480	GRMZM2G477205	Glyma10g43120
miR536a	can-miR536-5p	1	Capana06g000703	Solute carrier family 35 member	AT3G59310	LOC_Os05g23440	GRMZM2G173684	Glyma08g47720
miR1446a	can-miR1446b-3p	1	Capana00g003515	Putative DEAD-box ATP-dependent RNA helicase	AT2G37920	LOC_Os02g35620	GRMZM2G436328	Glyma03g24216
miR1507a	can-miR1507-3p	4	Capana02g001536	Probable disease resistance RPP8-like protein	AT1G53350	LOC_Os07g08890	AC203972.3	Glyma01g37620
			Capana02g001535	Putative late blight resistance protein homolog R1B-12	AT1G58410	LOC_Os06g06390	GRMZM5G898898	Glyma11g07680
			Capana05g001602	Putative late blight resistance protein homolog R1A-6	AT1G50180	LOC_Os11g41540	GRMZM2G004412	Glyma12g01420
			Capana09g000421	Putative late blight resistance protein homolog R1B-16	AT5G48620	LOC_Os11g44970	AC203972.3	Glyma12g01420
	can-miR1507-5p	1	Capana06g000358	Flavoprotein	AT5G58800	LOC_Os08g04460	GRMZM2G159643	Glyma14g37150
miR2873a	can-miR2873a	8	Capana07g000776	Adagio protein	AT5G57360	LOC_Os06g47890	GRMZM2G113244	Glyma15g17480
			Capana07g001958	U-box domain-containing protein	AT5G01830	LOC_Os05g39930	GRMZM2G027375	Glyma01g32430
			Capana08g002813	MATE efflux family protein	AT4G38380	LOC_Os09g37610	GRMZM2G080450	Glyma02g48060
			Capana03g000608	(+)-neomenthol dehydrogenase	AT5G61830	LOC_Os01g70430	GRMZM2G026758	Glyma09g20260
			Capana00g002376	Uncharacterized protein	AT2G27260	LOC_Os11g05870	GRMZM2G074306	Glyma13g38990
			Capana10g002135	Syntaxin	AT1G16240	LOC_Os08g17600	GRMZM2G115775	Glyma18g10060
			Capana06g000463	Licodione synthase	AT5G06900	LOC_Os06g41070	GRMZM2G013956	Glyma12g07190
			Capana01g001580	G-type lectin S-receptor-like serine/threonine-protein kinase	AT5G60900	LOC_Os04g39930	GRMZM2G017164	Glyma15g40080
miR3627a	can-miR3627	4	Capana02g002933	GTP-binding protein	AT3G49725	LOC_Os03g51790	GRMZM2G101460	Glyma02g44930
			Capana01g003347	DNA2-like helicase	AT1G08840	LOC_Os09g04440	GRMZM2G100732	Glyma06g46721
			Capana08g002604	Cysteine proteinase	AT4G39090	LOC_Os02g27030	GRMZM2G098298	Glyma04g03020
			Capana08g001214	Pentatricopeptide repeat-containing protein	AT3G62470	LOC_Os05g28720	AC187551.3	Glyma13g29910
miR4376a	can-miR4376-5p	1	Capana03g001186	Kinetochore protein	AT3G48210	LOC_Os01g74170	GRMZM5G832175	Glyma05g02480
miR4414a	can-miR4414a-5p	1	Capana04g001616	STOP (SENSITIVE TO PROTON RHIZOTOXICITY)	AT1G34370	LOC_Os01g65080	GRMZM2G075956	Glyma16g27280
miR5300a	can-miR5300-3p	2	Capana12g002925	Bromodomain adjacent to zinc finger domain protein	AT5G08630	LOC_Os02g35100	GRMZM2G064145	Glyma06g16731
			Capana01g001855	Serine/threonine-protein phosphatase	AT2G27210	LOC_Os03g44500	GRMZM2G009593	Glyma12g10120
	can-miR5300-5p	2	Capana10g001855	Hyoscyamine 6-dioxygenase	AT1G52820	LOC_Os05g50090	GRMZM2G062632	Glyma07g03801
			Capana01g001331	Glyoxylate reductase	AT2G45630	LOC_Os04g01650	GRMZM2G136072	Glyma07g08985
miR5301a	can-miR5301-3p	2	Capana04g001047	Dynein assembly factor	AT1G78230	LOC_Os03g09070	GRMZM2G080530	Glyma06g10780
			Capana01g000864	Putative disease resistance protein RGA3	AT3G14470	LOC_Os05g41290	GRMZM2G322748	Glyma09g02420
miR5303a	can-miR5303c-5p	1	Capana12g000913	MADS-box transcription factor	AT5G65050	LOC_Os02g49840	GRMZM2G072582	Glyma02g13401
miR6149a	can-miR6149-3p	8	Capana02g001512	40S ribosomal protein	AT3G11510	LOC_Os02g33140	GRMZM5G805627	Glyma03g40110
			Capana11g002190	Putative phospholipid-transporting ATPase	AT1G68710	LOC_Os05g01030	GRMZM2G027860	Glyma02g14350
			Capana00g002504	Kinesin-related protein	AT3G43210	LOC_Os01g33040	GRMZM2G136838	Glyma13g17440
			Capana02g002754	Beta-galactosidase	AT4G36360	LOC_Os03g06940	GRMZM2G417455	Glyma11g07760
			Capana04g001625	RNA-binding protein	AT1G51510	LOC_Os05g04850	GRMZM5G803275	Glyma01g43710
			Capana12g000509	Poly(A) polymerase	AT4G32850	LOC_Os06g36360	GRMZM2G109009	Glyma04g09170
			Capana01g000345	DNA-directed RNA polymerase D subunit	AT1G63020	LOC_Os02g05880	GRMZM2G007681	Glyma01g42480
			Capana01g000343	DNA-directed RNA polymerase D subunit	AT1G63020	LOC_Os02g05880	GRMZM2G007681	Glyma11g02921
	can-miR6149-5p	5	Capana01g000973	F-box protein	AT4G12560	LOC_Os12g06740	NA	Glyma09g01330
			Capana01g001677	F-box protein	AT4G12560	LOC_Os02g35560	GRMZM2G049364	Glyma15g12190
			Capana01g000622	Putative F-box protein	AT5G65850	LOC_Os09g27570	GRMZM2G082964	Glyma10g34340
			Capana08g001873	Putative F-box protein	AT1G50870	LOC_Os12g06740	NA	Glyma19g06660
			Capana00g002903	F-box protein	AT4G12560	NA	NA	Glyma13g28210
miRC1b	can-miRC1-5p	7	Capana03g000238	Acid phosphatase	AT4G29270	LOC_Os05g10330	GRMZM2G001508	Glyma08g21420
			Capana04g002321	Probable serine protease	AT4G36195	LOC_Os10g36760	GRMZM2G082502	Glyma16g24270
			Capana01g002719	DNA topoisomerase 2-binding protein	AT1G77320	LOC_Os11g08660	GRMZM2G395736	Glyma16g00740
			Capana04g002531	Homeobox-leucine zipper protein	AT4G04890	LOC_Os04g53540	GRMZM2G130442	Glyma12g10710
			Capana12g002890	tRNA (guanine(9)-N1)-methyltransferase	AT5G47680	LOC_Os02g49360	GRMZM2G312944	Glyma09g01690
			Capana09g001217	Putative disease resistance protein RGA1	AT3G14460	LOC_Os11g24170	GRMZM2G045027	Glyma13g04230
			Capana05g002480	UPF0655 protein	AT5G32470	LOC_Os08g45160	GRMZM2G148896	Glyma20g36980
miRC2b	can-miRC2a-3p	6	Capana09g002434	125 kDa kinesin-related protein	AT2G36200	LOC_Os05g02670	GRMZM2G320689	Glyma19g38150
			Capana01g001854	Serine/threonine-protein phosphatase	AT2G27210	LOC_Os03g44500	GRMZM2G009593	Glyma11g18090
			Capana03g001346	Cytochrome P450	AT3G48520	LOC_Os11g29290	GRMZM2G164074	Glyma01g27470
			Capana04g001089	Polyphosphoinositide phosphatase	AT1G22620	LOC_Os08g01750	GRMZM5G871143	Glyma08g26040
			Capana04g001672	Polyphosphoinositide phosphatase	AT1G22620	LOC_Os08g01750	GRMZM5G871143	Glyma12g00320
			Capana04g001058	MYB transcription factor	AT1G34670	LOC_Os08g37970	GRMZM2G159547	Glyma06g10840
	can-miRC2b-5p	9	Capana02g003284	Serine carboxypeptidase-like	AT3G02110	LOC_Os02g55130	GRMZM5G879749	Glyma08g26930
			Capana02g001524	Putative F-box/LRR-repeat/kelch-repeat protein	AT5G42430	LOC_Os01g28150	GRMZM2G047777	Glyma16g06880
			Capana03g000502	DCL4 (Endoribonuclease Dicer homolog 4)	AT4G00420	LOC_Os09g24954	GRMZM2G042006	Glyma17g11235
			Capana06g000238	PPR repeat containing gene	AT3G02330	LOC_Os10g40920	GRMZM2G304965	Glyma18g51240
			Capana06g001437	Flotillin-like protein	AT5G25250	LOC_Os10g34040	GRMZM5G892700	Glyma06g06930
			Capana02g001517	F-box protein	AT3G08750	LOC_Os02g41910	NA	Glyma09g01330
			Capana02g001514	F-box protein CPR30	AT5G65850	LOC_Os09g34200	GRMZM2G064954	Glyma16g06890
			Capana10g002289	Probable disease resistance protein	AT4G19060	LOC_Os01g58510	GRMZM2G178704	Glyma01g04241
			Capana06g000735	Salt tolerance protein	AT1G06040	LOC_Os04g41560	GRMZM2G019335	Glyma13g41980
miRC3b	can-miRC3-3p	2	Capana12g001220	Fructose-1,6-bisphosphatase	AT1G43670	LOC_Os05g36270	GRMZM5G836250	Glyma16g28310
			Capana02g001912	Auxin-repressed 12.5 kDa protein	AT1G28330	LOC_Os11g44810	GRMZM2G123896	Glyma15g08300
miRC4b	can-miRC4-3p	5	Capana11g000937	ATP-dependent DNA helicase Q-like 5	AT1G27880	NA	GRMZM2G306348	Glyma08g10780
			Capana02g001678	Probable LRR receptor-like serine/threonine-protein kinase	AT1G53440	LOC_Os09g17630	GRMZM2G011526	Glyma06g31630
			Capana02g001677	Probable LRR receptor-like serine/threonine-protein kinase	AT1G29750	LOC_Os09g17630	GRMZM2G126858	Glyma13g29640
			Capana07g000160	PPR repeat containing gene	AT1G50270	LOC_Os01g55960	GRMZM2G094999	Glyma19g39670
			Capana12g000664	Uncharacterized protein	AT1G75380	LOC_Os08g26870	GRMZM2G053531	Glyma14g07830
	can-miRC4-5p	1	Capana02g000304	PHLOEM PROTEIN 2-LIKE Protein	AT4G19840	LOC_Os01g06500	GRMZM2G073693	Glyma20g02610
miRC6b	can-miRC6-3p	2	Capana06g001375	Vesicle-fusing ATPase	AT4G04910	LOC_Os05g44310	GRMZM2G587327	Glyma13g24850
			Capana10g000959	E3 ubiquitin-protein ligase	AT4G38600	LOC_Os01g14950	GRMZM2G049141	Glyma04g00530
	can-miRC6-5p	3	Capana04g002379	Oligopeptide transporter	AT4G10770	LOC_Os06g03540	GRMZM5G825515	Glyma02g05300
			Capana00g003923	31 kDa ribonucleoprotein	AT5G51300	LOC_Os07g43810	GRMZM2G034313	Glyma09g36510
			Capana03g001276	Cytochrome P450	AT4G13310	LOC_Os09g26980	GRMZM2G125482	Glyma13g25030
miRC7b	can-miRC7-3p.1	3	Capana12g002157	Receptor-like protein	AT3G05660	LOC_Os01g06790	GRMZM2G131749	Glyma16g28410
			Capana12g000122	Receptor-like protein	AT1G47890	LOC_Os04g40440	GRMZM2G174128	Glyma14g05040
			Capana02g002706	Ethylene-responsive transcription factor	AT3G14230	LOC_Os06g09390	GRMZM2G171179	Glyma16g01500
	can-miRC7-5p.1	1	Capana03g003745	Probable glutamate carboxypeptidase	AT5G19740	LOC_Os01g54010	GRMZM2G118806	Glyma01g01000
miRC8b	can-miRC8-3p	1	Capana00g003671	Histone-lysine N-methyltransferase	AT4G30860	LOC_Os09g13740	GRMZM2G067019	Glyma06g29960
	can-miRC8-5p	1	Capana00g002436	26S proteasome non-ATPase regulatory subunit	AT2G32730	LOC_Os08g12820	GRMZM2G156145	Glyma08g05350
miRC9b	can-miRC9-3p	4	Capana07g002467	Protein unc-45 homolog	AT1G56090	LOC_Os04g52580	GRMZM2G008060	Glyma15g41110
			Capana06g000705	Uncharacterized protein	AT3G59300	LOC_Os01g67370	GRMZM2G141600	Glyma14g03740
			Capana07g002158	PPR repeat containing gene	AT4G18520	LOC_Os03g44210	GRMZM2G333641	Glyma20g02830
			Capana08g001000	Probable membrane-associated kinase regulator	AT5G52900	NA	NA	Glyma02g11810
	can-miRC9-5p	1	Capana10g001171	Calcium-binding protein	AT4G20780	LOC_Os03g21380	GRMZM2G312661	Glyma09g40740
miRC10b	can-miRC10-3p	2	Capana11g001490	UPF0392 protein	AT1G27200	LOC_Os08g02850	GRMZM2G049185	Glyma02g03040
			Capana09g001710	Probable N6-adenosine-methyltransferase	AT4G10760	LOC_Os02g45110	GRMZM2G116563	Glyma07g07300
miRC12b	can-miRC12-5p	1	Capana11g000220	Histone deacetylase	AT3G44680	LOC_Os04g33480	GRMZM2G119703	Glyma12g09190
miRC13b	can-miRC13-5p.2	3	Capana00g000651	Lysosomal beta glucosidase	AT5G20950	LOC_Os01g56510	GRMZM2G147687	Glyma09g02731
			Capana06g000675	Lysosomal beta glucosidase	AT5G20950	LOC_Os01g56510	GRMZM2G147687	Glyma10g15980
			Capana10g000299	Sec1 family domain-containing protein	AT2G42700	LOC_Os11g06810	GRMZM2G077490	Glyma12g15440
miRC14b	can-miRC14-3p	3	Capana04g000010	Cell division control protein 48 homolog	AT3G01610	LOC_Os06g01980	GRMZM2G134749	Glyma08g19920
			Capana12g002665	PPR repeat containing gene	AT2G35030	LOC_Os08g37520	GRMZM2G140600	Glyma08g14200
			Capana10g000228	Cell division control protein 48 homolog	AT3G01610	LOC_Os06g01980	GRMZM2G475360	Glyma08g19920
	can-miRC14-5p	1	Capana01g002566	Putative tRNA (cytidine(34)-2'-O)-methyltransferase	AT5G26880	LOC_Os08g39600	GRMZM5G854901	Glyma08g16210
miRC15b	can-miRC15-3p	5	Capana12g000256	Magnesium transporter	AT3G23870	LOC_Os04g30450	GRMZM2G092991	Glyma05g28580
			Capana07g001273	UDP-N-acetylglucosamine/UDP-glucose/GDP-mannose transporter	AT4G32272	LOC_Os02g40030	GRMZM2G133226	Glyma17g32030
			Capana01g003983	B3 domain-containing protein	AT2G24645	LOC_Os12g40090	GRMZM2G088427	Glyma14g08641
			Capana10g001997	Peptidyl-prolyl cis-trans isomerase	AT5G48570	LOC_Os08g41390	GRMZM2G096585	Glyma03g27750
			Capana06g002791	UDP-galactose/UDP-glucose transporter	AT3G46180	LOC_Os05g02490	GRMZM2G005163	Glyma12g07170
	can-miRC15-5p	8	Capana01g001601	Putative PPR repeat containing gene	AT1G10330	LOC_Os05g18950	GRMZM2G480380	Glyma06g44400
			Capana05g001661	tRNA-specific adenosine deaminase	AT1G01760	LOC_Os04g58690	GRMZM2G042599	Glyma03g01570
			Capana03g000771	Probable methyltransferase	AT1G26850	LOC_Os09g24900	GRMZM2G114706	Glyma08g41220
			Capana10g000991	PHYA (Phytochrome A)	AT1G09570	LOC_Os03g51030	GRMZM2G157727	Glyma10g28170
			Capana06g002281	Ankyrin repeat domain-containing protein	AT3G04470	LOC_Os02g56530	GRMZM2G034005	Glyma03g41080
			Capana10g000867	Sec14 cytosolic factor	AT4G39170	LOC_Os02g04020	GRMZM2G171354	Glyma11g12260
			Capana02g001395	Histone acetyltransferase	AT2G19260	LOC_Os04g34720	GRMZM2G319022	Glyma04g00320
			Capana00g003561	Tetratricopeptide repeat protein	AT4G28600	LOC_Os10g33290	GRMZM2G117763	Glyma10g32710
miRC16b	can-miRC16-3p.3	3	Capana02g000269	Probable potassium transporter	AT2G35060	LOC_Os04g52390	GRMZM2G327234	Glyma08g09140
			Capana02g000266	Potassium transporter	AT2G35060	LOC_Os04g52390	GRMZM2G086389	Glyma05g26210
			Capana08g002518	Dolichyl-diphosphooligosaccharide--protein glycosyltransferase 48 kDa subunit	AT5G66680	LOC_Os07g10830	GRMZM2G462325	Glyma12g04950
miRC17b	can-miRC17a-3p	1	Capana09g001589	AT-rich interactive domain-containing protein	AT5G04110	LOC_Os04g08410	GRMZM2G424651	Glyma09g39361
	can-miRC17a-5p	1	Capana06g002420	Autophagy-related protein	AT5G61500	LOC_Os01g10290	GRMZM5G818887	Glyma12g00830
	can-miRC17b-5p	1	Capana06g002420	Autophagy-related protein	AT5G61500	LOC_Os01g10290	GRMZM5G818887	Glyma12g00830
miRC18b	can-miRC18-3p	1	Capana02g001645	Probable complex I intermediate-associated protein	AT4G18810	LOC_Os02g13970	GRMZM2G019358	Glyma08g12480
miRC19b	can-miRC19-3p	1	Capana08g000084	Adagio protein	AT1G68050	LOC_Os11g34460	GRMZM2G107945	Glyma05g34530
	can-miRC19-5p	2	Capana04g000254	Adenylosuccinate lyase	AT4G18440	LOC_Os03g19930	GRMZM2G359070	Glyma14g06780
			Capana01g004410	FAM10 family protein	AT4G22670	LOC_Os02g01030	GRMZM2G134806	Glyma05g03770
miRC20b	can-miRC20-3p	3	Capana03g002529	Serine/threonine-protein kinase	AT4G24740	LOC_Os12g27520	GRMZM2G179308	Glyma05g02740
			Capana04g000460	Proline-rich receptor-like protein kinase	AT3G13690	LOC_Os01g41870	GRMZM2G480607	Glyma14g08600
			Capana12g002767	60S ribosomal export protein	AT2G03820	LOC_Os10g42320	GRMZM2G169931	Glyma11g33380
	can-miRC20-5p	3	Capana03g000937	Uncharacterized zinc finger protein	AT4G06634	LOC_Os05g01550	GRMZM2G175000	Glyma05g30150
			Capana07g001441	Aconitate hydratase	AT2G05710	LOC_Os08g09200	GRMZM2G171707	Glyma12g32000
			Capana01g000746	Eukaryotic translation initiation factor	AT3G60240	LOC_Os07g36940	GRMZM2G386430	Glyma08g45425
miRC21b	can-miRC21-3p	1	Capana12g002275	PPR repeat containing gene	AT2G27610	LOC_Os04g14130	GRMZM2G129783	Glyma07g19750
miRC22b	can-miRC22-3p	1	Capana00g002335	Subtilisin-like protease	AT5G67090	LOC_Os01g64850	GRMZM2G026535	Glyma20g36220
miRC23b	can-miRC23-3p	1	Capana03g000834	Chaperone protein	AT1G74310	LOC_Os05g44340	GRMZM2G360681	Glyma05g00540
miRC24b	can-miRC24-5p	3	Capana01g002573	Zinc finger A20 and AN1 domain-containing stress-associated protein	AT1G51200	LOC_Os06g41010	GRMZM2G058866	Glyma12g06016
			Capana07g000168	Probable RNA-dependent RNA polymerase	AT2G19930	LOC_Os01g10130	GRMZM2G327247	Glyma01g01210
			Capana00g004988	Putative E3 ubiquitin-protein ligase	AT3G06880	LOC_Os01g12930	GRMZM2G153127	Glyma10g33851
miRC25b	can-miRC25-3p	1	Capana04g002077	Small glutamine-rich tetratricopeptide repeat-containing protein	AT4G08320	LOC_Os04g59394	GRMZM5G827171	Glyma14g23650
	can-miRC25-5p	3	Capana06g002690	TIC protein	AT3G46780	LOC_Os05g22614	GRMZM2G449496	Glyma11g14410
			Capana00g001034	Alpha,alpha-trehalose-phosphate synthase	AT1G78580	LOC_Os05g44210	GRMZM2G068943	Glyma05g29651
			Capana11g000743	Mitogen-activated protein kinase 18	AT1G53510	LOC_Os06g26340	GRMZM2G007848	Glyma15g38490
miRC27b	can-miRC27-5p	5	Capana05g000037	Dihydroneopterin aldolase	AT3G11750	LOC_Os09g38759	GRMZM2G015588	Glyma07g07420
			Capana05g000255	Probable LRR receptor-like serine/threonine-protein kinase	AT3G47570	LOC_Os11g47180	GRMZM2G316907	Glyma05g25641
			Capana05g000256	LRR receptor-like serine/threonine-protein kinase	AT5G46330	LOC_Os06g38670	GRMZM2G456669	Glyma05g26520
			Capana05g000290	LRR receptor-like serine/threonine-protein kinase	AT4G20140	LOC_Os11g35840	GRMZM2G447447	Glyma16g31724
			Capana05g000284	LRR receptor-like serine/threonine-protein kinase	AT3G47110	LOC_Os02g11930	GRMZM2G456669	Glyma05g25641
miRC28b	can-miRC28-5p	3	Capana07g000178	Signal recognition particle receptor subunit alpha	AT4G30600	LOC_Os08g37444	GRMZM2G060296	Glyma06g28570
			Capana03g001147	NLRC3 protein	AT5G55540	LOC_Os03g53990	GRMZM2G421500	Glyma08g43730
			Capana00g002241	Protein	AT4G17720	LOC_Os04g50790	GRMZM2G051890	Glyma01g01950
miRC29b	can-miRC29-3p	1	Capana00g004155	Early nodulin-like protein	AT3G20570	LOC_Os01g54430	GRMZM2G010762	Glyma06g42110
a Pepper specific microRNAs; b Pepper novel microRNAs; NA, not available.
