# Supplementary material for: Identification of MicroRNA Targets of Capsicum spp. Using MiRTrans—a Trans-Omics Approach
Source: Front Plant Sci. 2017 Apr 10;8:495. doi: 10.3389/fpls.2017.00495 (PMC5385386; doi:10.3389/fpls.2017.00495)
Supplement: Supplementary file 9 [file Table9.xlsx]

## Sheet: Table S5
Table S9.Transcription factor targets of arabidopsis, rice, soybean and pepper miRNAs
microRNA family	Target family	A.t.	Conﬁrmed targets	Conﬁrmation method	O.s.	Conﬁrmed targets	Conﬁrmation method	Z.m	Conﬁrmed targets	Conﬁrmation method	G.m	Conﬁrmed targets	Conﬁrmation method	C.a	Targets
miR156	SBP [1]	11	SPL2, SPL3, SPL4, SPL5, SPL6, SPL9, SPL10, SPL15, AT5G50570, AT5G50670 [2-8]	5' RACE, Degradome	10	Os01g69830, Os02g04680, Os06g45310, Os07g32170, Os11g30370, Os02g07780, Os08g39890, Os06g49010, Os09g32944, Os09g31438 [9-12]	5' RACE, Degradome, microRNA-resistant target	13	GRMZM2G156621, GRMZM2G067624, GRMZM2G163813, GRMZM2G113779, GRMZM2G126827, GRMZM2G318882, GRMZM2G136158, GRMZM2G460544, GRMZM5G878561, GRMZM2G307588, GRMZM2G371033, GRMZM2G160917, GRMZM2G126018 [13, 14]	Degradome	13	Glyma04g37390, Glyma06g17700, Glyma05g00200, Glyma04g32070, Glyma17g08840, Glyma05g38180, Glyma08g01450, Glyma18g00890, Glyma12g27330, Glyma11g36980, Glyma02g30670, Glyma18g36960, Glyma02g13370 [15-16]	Degradome	5	Capana02g001917, Capana01g002647 Capana10g000709, Capana11g002003 Capana10g002379
miR159/319	MYB [1, 17]	8	MYB33, MYB65 [6, 18-22]	5' RACE, Agro-inﬁltration, microRNA-resistant target, Degradome	2	Os01g59660, Os06g40330 [9, 23]	5' RACE, Degradome	7	GRMZM2G139688, GRMZM2G093789, GRMZM2G167088, GRMZM2G028054, GRMZM2G075064, GRMZM2G423833, GRMZM2G089361 [14]	Degradome	3	Glyma15g35860, Glyma13g25720, Glyma20g11040 [15, 24]	Degradome	3	Capana01g001817, Capana07g002088 Capana06g000689
miR159/319	TCP [18]	6	TCP2, TCP3, TCP4, TCP10, TCP24, AT4G18390 [6, 18, 25]	5' RACE, microRNA-resistant target, Degradome	1	Os07g05720 [9]	5' RACE, Degradome	9	GRMZM2G412073, GRMZM2G028054, GRMZM2G180568, GRMZM2G020805, GRMZM2G089361, GRMZM2G115516, GRMZM2G109843, GRMZM2G056612, GRMZM2G015037, AC205574.3_FG006 [14]	Degradome	9	Glyma13g29160, Glyma08g10350, Glyma15g09910, Glyma13g34690, Glyma12g35720, Glyma14g06680, Glyma02g42220, Glyma13g36840, Glyma12g33640 [15]	Degradome	5	Capana09g000876, Capana09g000876 Capana07g002142, Capana07g001792 Capana00g005070
miR160	ARF [1]	3	ARF10, ARF16, ARF17 [2, 6, 26-28]	5' RACE, in vitro cleavage, Agro infiltration, microRNA-resistant target, Degradome	4	Os06g47150, Os10g33940, Os02g41800, Os04g43910 [9]	5' RACE, Degradome	7	GRMZM2G005284, AC207656.3_FGT002, GRMZM2G159399, GRMZM5G808366, GRMZM2G153233, GRMZM2G390641, GRMZM2G081406 [14]	Degradome	12	Glyma11g20490, Glyma10g35480, Glyma12g08110, Glyma13g20370, Glyma10g06080, Glyma13g02410, Glyma14g33730, Glyma19g36570, Glyma04g43350, Glyma13g40030, Glyma20g32040, Glyma12g29720 [15]	Degradome	6	Capana10g001462, Capana10g001461 Capana11g000076, Capana04g001778 Capana09g002164, Capana06g000514
miR164	NAC [1]	6	CUC1, CUC2, NAC1, NAC2, At5g07680, ANAC100/ATNAC5 [4, 6, 27, 29-32]	5' RACE, in vitro cleavage, Agro infiltration, microRNA-resistant target, Degradome	6	Os06g46270, Os08g10080, Os12g41680, Os02g36880, Os04g38720 [9]	5' RACE, Degradome	5	GRMZM2G457630, GRMZM2G370846, GRMZM2G370850, GRMZM2G393433, GRMZM2G163975 [14]	Degradome	10	Glyma17g10970, Glyma05g00930, Glyma06g21020, Glyma04g33270, Glyma13g34950, Glyma12g35530, Glyma15g40510, Glyma08g18470, Glyma12g26190, Glyma06g35660 [15]	Degradome	5	Capana07g002485, Capana07g002159 Capana01g000650, Capana02g003352 Capana03g000802
miR166	HD-ZIPIII [1]	5	ATHB-14/PHB, ATHB9/PHV, REV, ATHB-8, ATHB-15 [6, 33-37]	5' RACE, in vitro cleavage, microRNA-resistant target, Degradome	5	Os03g43930, Os10g33960, Os03g01890, Os12g41860 [9]	5' RACE, Degradome	5	GRMZM2G109987, GRMZM2G042250, GRMZM2G469551, GRMZM2G178102, GRMZM2G003509 [14]	Degradome	12	Glyma15g13640, Glyma08g21610, Glyma04g09000, Glyma07g01950, Glyma08g21620, Glyma07g01940, Glyma06g09100, Glyma05g30000, Glyma08g13110, Glyma09g02750, Glyma12g08080, Glyma11g20520 [15]	5' RACE, Degradome	7	Capana08g000475, Capana03g000260 Capana08g000474, Capana12g001247 Capana12g001248, Capana02g001374 Capana11g000079
miR167	ARF [1, 17]	2	ARF6, ARF8 [2, 4, 6, 38]	5' RACE	4	Os04g57610, Os02g06910, Os06g46410, Os12g41950 [9, 39]	5' RACE, Degradome	4	GRMZM2G028980, GRMZM2G089640, GRMZM2G078274, GRMZM2G475882 [14]	Degradome	7	Glyma15g09750, Glyma13g29320, Glyma05g27580, Glyma08g10550, Glyma18g05330, Glyma15g00770, Glyma02g40650 [15, 40]	Degradome	2	Capana04g002496, Capana04g002497
miR169	HAP2 [1] or CBF-B/NF-YA	8	At1g17590, At1g72830, At1g54160, At3g05690, At5g06510 [6, 41]	5' RACE, Degradome	8	Os02g53620, Os03g07880, Os03g29760, Os03g44540, Os03g48970, Os07g06470, Os07g41720, Os12g42400 [9]	5' RACE, Degradome	7	GRMZM5G829103, GRMZM2G165488, GRMZM2G037630, GRMZM2G000686, GRMZM5G857944, GRMZM2G038303, GRMZM2G091964 [14]	5' RACE, Degradome	7	Glyma08g45030, Glyma18g07890, Glyma17g05920, Glyma13g16770, Glyma09g07960, Glyma15g18970, Glyma19g38800 [15]	Degradome	1	Capana00g004836
miR171	SCL [42, 43]	3	SCL6, AT2G45160, AT3G60630 [4, 6, 44]	5' RACE, Agroinfiltration, Degradome	3	Os02g44360, Os04g46860, Os02g44370 [9]	5' RACE, Degradome	5	GRMZM2G418899, GRMZM2G037792, GRMZM5G825321, GRMZM2G110579, GRMZM2G098800 [14]	5' RACE, Degradome	3	Glyma08g08590, Glyma05g25610, Glyma09g04950 [15]	Degradome	3	Capana01g003567, Capana01g000561 Capana02g002660
miR172	AP2 [17]	6	AP2, AT5G67180, TOE1, TOE2, TOE3, SMZ [4, 6, 7, 45-49]	5' RACE, microRNA-resistant target, Degradome	4	Os05g03040, Os07g13170, Os04g55560, Os03g60430 [9, 12, 50, 51]	5' RACE, Degradome	6	GRMZM2G176175, GRMZM5G862109, GRMZM2G138676, GRMZM2G174784, GRMZM2G076602, GRMZM5G879527 [14, 52]	5' RACE, Degradome, genetic experiment	13	Glyma19g35560, Glyma03g32850, Glyma15g04930, Glyma13g40470, Glyma11g15650, Glyma12g07800, Glyma01g39520, Glyma11g05720, Glyma19g36200, Glyma03g33470, Glyma17g18640, Glyma02g09600, Glyma05g27370 [15, 53, 54]	Degradome	6	Capana09g001880, Capana04g002188 Capana02g003062, Capana02g000700 Capana11g000645, Capana06g000481
miR393	AFB or bZIP [41]	3	At1g27340 [41], AFB2, AFB3 [6]	5' RACE, Degradome	2	Os05g05800, Os04g32460 [9]	5' RACE, Degradome	2	GRMZM2G135978 [14]	Degradome	6	Glyma03g36770,Glyma19g39420, Glyma16g05500, Glyma19g27280, Glyma10g02630, Glyma02g17170 [15]	Degradome	3	Capana02g003700, Capana06g000011 Capana06g003032
miR396	GRF [41]	7	GRL1, GRL2, GRL3, GRL7, GRL8, GRL9 [6, 41]	5' RACE, Degradome	11	Os02g47280, Os03g47140, Os12g29980, Os04g51190, Os11g35030, Os06g02560, Os02g45570, Os02g53690, Os12g29980, Os04g48510, Os03g51970 [9, 55, 56]	5' RACE, Degradome	11	GRMZM2G018414, GRMZM2G099862, GRMZM2G098594, GRMZM2G119359, GRMZM2G124566, GRMZM2G045977, GRMZM2G041223, GRMZM2G129147, GRMZM2G178261, GRMZM2G033612 [14]	Degradome	21	Glyma03g02500, Glyma01g34650, Glyma09g34560, Glyma01g35140, Glyma07g04290, Glyma16g00970, Glyma13g16920, Glyma17g05800, Glyma09g07990, Glyma11g11820, Glyma11g01060, Glyma12g01730, Glyma01g44470, Glyma17g35090, Glyma17g35100, Glyma14g10090, Glyma04g40880, Glyma06g13960, Glyma13g22840, Glyma14g10100, Glyma15g19460 [15]	Degradome	1	Capana04g000859
miR444	MADS [57]	0			4	Os08g33488, Os02g36924, Os04g38780, Os02g49840 [9, 57]	5' RACE, Degradome	4			0			0
Total		65			64		5' RACE, Degradome	85			116			47
Predicted and conﬁrmed targets of Arabidopsis, rice, maize, soybean and peppr miRNAs that encode known or suspected transcription factors are listed. For each target family, the number of predicted target genes in each of five plant species with sequenced genomes (A.t., Arabidopsis thaliana; O.s., Oryza sativa; Z.m., Zea mays; G.m., Glycine max; C.a., Capsicum annuum) is indicated. Abbreviations:…
	Reference
	1. Rhoades MW, Reinhart BJ, Lim LP, Burge CB, Bartel B, et al. (2002) Prediction of plant microRNA targets. Cell 110: 513-520.
	2. Allen E, Xie Z, Gustafson AM, Carrington JC (2005) microRNA-directed phasing during trans-acting siRNA biogenesis in plants. Cell 121: 207-221.
	3. Chen J, Li WX, Xie D, Peng JR, Ding SW (2004) Viral virulence protein suppresses RNA silencing–mediated defense but upregulates the role of microRNA in host gene expression. The Plant Cell 16: 1302-1313.
	4. Kasschau KD, Xie Z, Allen E, Llave C, Chapman EJ, et al. (2003) P1/HC-Pro, a viral suppressor of RNA silencing, interferes with Arabidopsis development and miRNA function. Developmental cell 4: 205-217.
	5. Vazquez F, Vaucheret H, Rajagopalan R, Lepers C, Gasciolli V, et al. (2004) Endogenous trans-acting siRNAs regulate the accumulation of Arabidopsis mRNAs. Molecular cell 16: 69-79.
	6. Addo-Quaye C, Eshoo TW, Bartel DP, Axtell MJ (2008) Endogenous siRNA and miRNA targets identified by sequencing of the Arabidopsis degradome. Current Biology 18: 758-762.
	7. Wu G, Park MY, Conway SR, Wang J-W, Weigel D, et al. (2009) The sequential action of miR156 and miR172 regulates developmental timing in Arabidopsis. Cell 138: 750-759.
	8. Wu G, Poethig RS (2006) Temporal regulation of shoot development in Arabidopsis thaliana by miR156 and its target SPL3. Development 133: 3539-3547.
	9. Li YF, Zheng Y, Addo‐Quaye C, Zhang L, Saini A, et al. (2010) Transcriptome‐wide identification of microRNA targets in rice. The Plant Journal 62: 742-759.
	10. Xie K, Wu C, Xiong L (2006) Genomic organization, differential expression, and interaction of SQUAMOSA promoter-binding-like transcription factors and microRNA156 in rice. Plant physiology 142: 280-293.
	11. Jiao Y, Wang Y, Xue D, Wang J, Yan M, et al. (2010) Regulation of OsSPL14 by OsmiR156 defines ideal plant architecture in rice. Nature genetics 42: 541-544.
	12. Wang L, Sun S, Jin J, Fu D, Yang X, et al. (2015) Coordinated regulation of vegetative and reproductive branching in rice. Proceedings of the National Academy of Sciences 112: 15504-15509.
	13. Chuck G, Cigan AM, Saeteurn K, Hake S (2007) The heterochronic maize mutant Corngrass1 results from overexpression of a tandem microRNA. Nature genetics 39: 544-549.
	14. Liu H, Qin C, Chen Z, Zuo T, Yang X, et al. (2014) Identification of miRNAs and their target genes in developing maize ears by combined small RNA and degradome sequencing. BMC genomics 15: 25.
	15. Song Q-X, Liu Y-F, Hu X-Y, Zhang W-K, Ma B, et al. (2011) Identification of miRNAs and their target genes in developing soybean seeds by deep sequencing. BMC Plant Biology 11: 5.
	16. Wang J-W (2014) Regulation of flowering time by the miR156-mediated age pathway. Journal of experimental botany 65: 4723-4730.
	17. Park W, Li J, Song R, Messing J, Chen X (2002) CARPEL FACTORY, a Dicer homolog, and HEN1, a novel protein, act in microRNA metabolism in Arabidopsis thaliana. Current Biology 12: 1484-1495.
	18. Palatnik JF, Allen E, Wu X, Schommer C, Schwab R, et al. (2003) Control of leaf morphogenesis by microRNAs. Nature 425: 257-263.
	19. Millar AA, Gubler F (2005) The Arabidopsis GAMYB-like genes, MYB33 and MYB65, are microRNA-regulated genes that redundantly facilitate anther development. The Plant Cell 17: 705-721.
	20. Achard P, Herr A, Baulcombe DC, Harberd NP (2004) Modulation of floral development by a gibberellin-regulated microRNA. Development 131: 3357-3365.
	21. Allen RS, Li J, Stahle MI, Dubroué A, Gubler F, et al. (2007) Genetic analysis reveals functional redundancy and the major target genes of the Arabidopsis miR159 family. Proceedings of the National Academy of Sciences 104: 16371-16376.
	22. Alonso-Peral MM, Li J, Li Y, Allen RS, Schnippenkoetter W, et al. (2010) The miR159 regulated GAMYB-like genes inhibit growth and promote Programmed Cell Death in Arabidopsis. Plant physiology.
	23. Tsuji H, Aya K, Ueguchi‐Tanaka M, Shimada Y, Nakazono M, et al. (2006) GAMYB controls different sets of genes and is differentially regulated by microRNA in aleurone cells and anthers. The Plant Journal 47: 427-444.
	24. Xu F, Liu Q, Chen L, Kuang J, Walk T, et al. (2013) Genome-wide identification of soybean microRNAs and their targets reveals their organ-specificity and responses to phosphate starvation. BMC genomics 14: 66.
	25. Nag A, King S, Jack T (2009) miR319a targeting of TCP4 is critical for petal growth and development in Arabidopsis. Proceedings of the National Academy of Sciences 106: 22534-22539.
	26. Wang J-W, Wang L-J, Mao Y-B, Cai W-J, Xue H-W, et al. (2005) Control of root cap formation by microRNA-targeted auxin response factors in Arabidopsis. The Plant Cell 17: 2204-2216.
	27. Mallory AC, Bartel DP, Bartel B (2005) MicroRNA-directed regulation of Arabidopsis AUXIN RESPONSE FACTOR17 is essential for proper development and modulates expression of early auxin response genes. The Plant Cell 17: 1360-1375.
	28. Kepinski S, Leyser O (2005) The Arabidopsis F-box protein TIR1 is an auxin receptor. Nature 435: 446-451.
	29. Guo H-S, Xie Q, Fei J-F, Chua N-H (2005) MicroRNA directs mRNA cleavage of the transcription factor NAC1 to downregulate auxin signals for Arabidopsis lateral root development. The Plant Cell 17: 1376-1386.
	30. Laufs P, Peaucelle A, Morin H, Traas J (2004) MicroRNA regulation of the CUC genes is required for boundary size control in Arabidopsis meristems. Development 131: 4311-4322.
	31. Peaucelle A, Morin H, Traas J, Laufs P (2007) Plants expressing a miR164-resistant CUC2 gene reveal the importance of post-meristematic maintenance of phyllotaxy in Arabidopsis. Development 134: 1045-1050.
	32. Sieber P, Wellmer F, Gheyselinck J, Riechmann JL, Meyerowitz EM (2007) Redundancy and specialization among plant microRNAs: role of the MIR164 family in developmental robustness. Development 134: 1051-1060.
	33. Emery JF, Floyd SK, Alvarez J, Eshed Y, Hawker NP, et al. (2003) Radial patterning of Arabidopsis shoots by class III HD-ZIP and KANADI genes. Current Biology 13: 1768-1774.
	34. Kim J, Jung JH, Reyes JL, Kim YS, Kim SY, et al. (2005) microRNA‐directed cleavage of ATHB15 mRNA regulates vascular development in Arabidopsis inflorescence stems. The Plant Journal 42: 84-94.
	35. Matranga C, Tomari Y, Shin C, Bartel DP, Zamore PD (2005) Passenger-strand cleavage facilitates assembly of siRNA into Ago2-containing RNAi enzyme complexes. Cell 123: 607-620.
	36. Tang G, Reinhart BJ, Bartel DP, Zamore PD (2003) A biochemical framework for RNA silencing in plants. Genes & development 17: 49-63.
	37. Williams L, Grigg SP, Xie M, Christensen S, Fletcher JC (2005) Regulation of Arabidopsis shoot apical meristem and lateral organ formation by microRNA miR166g and its AtHD-ZIP target genes. Development 132: 3657-3668.
	38. Wu M-F, Tian Q, Reed JW (2006) Arabidopsis microRNA167 controls patterns of ARF6 and ARF8 expression, and regulates both female and male reproduction. Development 133: 4211-4218.
	39. Yang JH, Han SJ, Yoon EK, Lee WS (2006) Evidence of an auxin signal pathway, microRNA167-ARF8-GH3, and its response to exogenous auxin in cultured rice cells. Nucleic acids research 34: 1892-1899.
	40. Wang Y, Li K, Chen L, Zou Y, Liu H, et al. (2015) microRNA167-directed regulation of the auxin response factors, GmARF8a and GmARF8b, is required for soybean (Glycine max L.) nodulation and lateral root development. Plant physiology: pp. 00265.02015.
	41. Jones-Rhoades MW, Bartel DP (2004) Computational identification of plant microRNAs and their targets, including a stress-induced miRNA. Molecular cell 14: 787-799.
	42. Llave C, Kasschau KD, Rector MA, Carrington JC (2002) Endogenous and silencing-associated small RNAs in plants. The Plant Cell 14: 1605-1619.
	43. Reinhart BJ, Weinstein EG, Rhoades MW, Bartel B, Bartel DP (2002) MicroRNAs in plants. Genes & development 16: 1616-1626.
	44. Llave C, Xie Z, Kasschau KD, Carrington JC (2002) Cleavage of Scarecrow-like mRNA targets directed by a class of Arabidopsis miRNA. Science 297: 2053-2056.
	45. Chen X (2004) A microRNA as a translational repressor of APETALA2 in Arabidopsis flower development. Science 303: 2022-2025.
	46. Aukerman MJ, Sakai H (2003) Regulation of flowering time and floral organ identity by a microRNA and its APETALA2-like target genes. The Plant Cell 15: 2730-2741.
	47. Jung J-H, Seo Y-H, Seo PJ, Reyes JL, Yun J, et al. (2007) The GIGANTEA-regulated microRNA172 mediates photoperiodic flowering independent of CONSTANS in Arabidopsis. The Plant Cell 19: 2736-2748.
	48. Wang J-W, Czech B, Weigel D (2009) miR156-regulated SPL transcription factors define an endogenous flowering pathway in Arabidopsis thaliana. Cell 138: 738-749.
	49. Mathieu J, Yant LJ, Murdter F, Kuttner F, Schmid M (2009) Repression of flowering by the miR172 target SMZ. PLoS biology 7: 1626.
	50. Lee Y-S, Lee D-Y, Cho L-H, An G (2014) Rice miR172 induces flowering by suppressing OsIDS1 and SNB, two AP2 genes that negatively regulate expression of Ehd1 and florigens. Rice 7: 1-13.
	51. Zhu Q-H, Upadhyaya NM, Gubler F, Helliwell CA (2009) Over-expression of miR172 causes loss of spikelet determinacy and floral organ abnormalities in rice (Oryza sativa). BMC Plant Biology 9: 149.
	52. Chuck G, Meeley R, Irish E, Sakai H, Hake S (2007) The maize tasselseed4 microRNA controls sex determination and meristem cell fate by targeting Tasselseed6/indeterminate spikelet1. Nature genetics 39: 1517-1521.
	53. Yan Z, Hossain MS, Wang J, Valdés-López O, Liang Y, et al. (2013) miR172 regulates soybean nodulation. Molecular Plant-Microbe Interactions 26: 1371-1377.
	54. Wang Y, Wang L, Zou Y, Chen L, Cai Z, et al. (2014) Soybean miR172c targets the repressive AP2 transcription factor NNC1 to activate ENOD40 expression and regulate nodule initiation. The Plant Cell 26: 4782-4801.
	55. Gao F, Wang K, Liu Y, Chen Y, Chen P, et al. (2015) Blocking miR396 increases rice yield by shaping inflorescence architecture. Nature Plants: 15196.
	56. Che R, Tong H, Shi B, Liu Y, Fang S, et al. (2015) Control of grain size and rice yield by GL2-mediated brassinosteroid responses. Nature Plants: 15195.
	57. Sunkar R, Girke T, Jain PK, Zhu J-K (2005) Cloning and characterization of microRNAs from rice. The Plant Cell 17: 1397-1411.
